1  
2 **Protein Phosphatase 1 activity controls a balance between collective and single cell modes**  
3 **of migration**

4  
5 Yujun Chen<sup>1</sup>, Nirupama Kotian<sup>1</sup>, George Aranjuez<sup>2,†</sup>, Lin Chen<sup>3</sup>, C. Luke Messer<sup>1</sup>, Ashley  
6 Burtscher<sup>2</sup>, Ketki Sawant<sup>1</sup>, Damien Ramel<sup>3,§</sup>, Xiaobo Wang<sup>3</sup>, and Jocelyn A. McDonald<sup>1\*</sup>

7  
8  
9 <sup>1</sup>Division of Biology, Kansas State University, Manhattan, KS, USA

10 <sup>2</sup>Lerner Research Institute, Cleveland Clinic, Cleveland, OH, USA

11 <sup>3</sup>LBCMCP, Centre de Biologie Intégrative (CBI), Université de Toulouse, CNRS, UPS,  
12 Toulouse, France

13 \*Author for correspondence: [jmcdona@ksu.edu](mailto:jmcdona@ksu.edu); Tel: +1 785-532-6087

14  
15  
16 <sup>†</sup>Present address: Division of Immunity and Pathogenesis, Burnett School of Biomedical  
17 Sciences, University of Central Florida College of Medicine, Orlando, Florida, USA

18 <sup>§</sup>Present address: Institute of Metabolic and Cardiovascular Diseases (I2MC), Université de  
19 Toulouse, Institut National de la Santé et de la Recherche Médicale (INSERM) UMR1048,  
20 Toulouse, France

21

22 **Abstract**

23 Collective cell migration is central to many developmental and pathological processes. However,  
24 the mechanisms that keep cell collectives together and coordinate movement of multiple cells are  
25 poorly understood. Using the *Drosophila* border cell migration model, we find that Protein  
26 phosphatase 1 (Pp1) activity controls collective cell cohesion and migration. Inhibition of Pp1  
27 causes border cells to round up, dissociate, and move as single cells with altered motility. We  
28 present evidence that Pp1 promotes proper levels of cadherin-catenin complex proteins at cell-  
29 cell junctions within the cluster to keep border cells together. Pp1 further restricts actomyosin  
30 contractility to the cluster periphery rather than at internal cell-cell contacts. We show that the  
31 myosin phosphatase Pp1 complex, which inhibits non-muscle myosin-II (Myo-II) activity,  
32 coordinates border cell shape and cluster cohesion. Given the high conservation of Pp1  
33 complexes, this study identifies Pp1 as a major regulator of collective versus single cell  
34 migration.

35

## 36 **Introduction**

37 Cells that migrate as collectives help establish and organize many tissues and organs in the  
38 embryo, yet also promote tumor invasion, dissemination and metastasis<sup>1-5</sup>. A wide variety of  
39 cells undergo collective cell migration during development, ranging from neural crest cells in  
40 *Xenopus*, the zebrafish lateral line primordium, and branching mammary glands<sup>2,5-7</sup>, among  
41 many other examples. Despite the apparent diversity in collectively migrating cell types, there is  
42 remarkable conservation of the cellular and molecular mechanisms that underlie group cell  
43 movements. In particular, migrating collectives require fine-tuned organization and cell  
44 coordination to move effectively as a unified group. Similar to individually migrating cells,  
45 collectively migrating cells display a front-rear polarity, but this polarity is often organized at the  
46 group level<sup>8</sup>. Leader cells at the front extend characteristic protrusions that help collectives  
47 navigate tissues. Mechanical cell coupling and biochemical signals then reinforce collective  
48 polarity by actively repressing protrusions from follower cells and by maintaining lead cell  
49 protrusions that pull the group forward<sup>8,9</sup>. Importantly, cell-cell adhesions keep collectives  
50 together by maintaining strong but flexible connections between cells. Moreover, many cell  
51 collectives exhibit a “supracellular” organization of the cytoskeleton at the outer perimeter of the  
52 entire cell group that serves to further coordinate multicellular movement<sup>7,10-12</sup>. Despite progress  
53 in understanding how single cells become polarized and motile, less is known about the  
54 mechanisms that control the global organization, cohesion, and coordination of cells in migrating  
55 collectives.

56 *Drosophila* border cells are a genetically tractable and relatively simple model well-  
57 suited to investigate how cell collectives undergo polarized and cooperative migration within a  
58 developing tissue<sup>13,14</sup>. The *Drosophila* ovary is composed of strings of ovarioles made up of

59 developing egg chambers, the functional unit of the *Drosophila* ovary. During late oogenesis,  
60 four to eight follicle cells are specified at the anterior end of the egg chamber to become  
61 migratory border cells. The border cells then surround a specialized pair of follicle cells, the  
62 polar cells, and delaminate as a multicellular cluster from the follicular epithelium.  
63 Subsequently, the border cell cluster undergoes a stereotyped collective migration, moving  
64 between 15 large germline-derived nurse cells to eventually reach the oocyte at the posterior end  
65 of the egg chamber (Figure 1A-F). Throughout migration, individual border cells maintain  
66 contacts with each other and with the central polar cells so that all cells move as a single  
67 cohesive unit<sup>15,16</sup>. A leader cell at the front extends a migratory protrusion whereas protrusions  
68 are suppressed in trailing follower cells<sup>17-19</sup>. As with other collectives, polarization of the border  
69 cell cluster is critical for the ability to move together and in the correct direction, in this case  
70 towards the oocyte (Figure 1A-F)<sup>17,18</sup>.

71 Polarization of the border cell cluster begins when two receptor tyrosine kinases (RTKs)  
72 expressed by border cells, PDGF- and VEGF-receptor related (PVR) and Epidermal Growth  
73 Factor Receptor (EGFR), respond to multiple growth factors secreted from the oocyte<sup>20,21</sup>.  
74 Signaling through PVR/EGFR increases activation of the small GTPase Rac, triggering F-actin  
75 polymerization and formation of a major protrusion in the lead border cell<sup>17,19,20,22</sup>. E-Cadherin-  
76 based adhesion to the nurse cell substrate stabilizes this lead cell protrusion via a feedback loop  
77 with Rac<sup>16</sup>. Furthermore, the endocytic protein Rab11 and the actin-binding protein Moesin  
78 mediate communication between border cells to restrict Rac activation to the lead cell<sup>23</sup>.  
79 Mechanical coupling of border cells through E-Cadherin suppresses protrusions in follower cells,  
80 both at cluster exterior surfaces but also between border cells and at contacts with polar cells<sup>13,16</sup>.  
81 E-Cadherin also maintains border cell attachment to the central polar cells. F-actin and non-

82 muscle myosin II (Myo-II) are enriched at the outer edges of the border cell cluster<sup>24-26</sup>. Such  
83 “inside-outside” polarity contributes to the overall cluster shape, cell-cell organization, and  
84 coordinated motility of all border cells<sup>13</sup>. While progress has been made in understanding the  
85 establishment of front-rear polarity, much less is known about how individual border cell  
86 behaviors are fine-tuned and adjusted to produce coordinated and cooperative movement of the  
87 cluster as an entire unit.

88 In the current study we made the unexpected discovery that Protein phosphatase 1 (Pp1)  
89 activity coordinates the collective behavior of individual border cells. Dynamic cycles of protein  
90 phosphorylation and dephosphorylation precisely control many signaling, adhesion and  
91 cytoskeletal pathways required for cell migration<sup>27</sup>. Serine-threonine kinases, such as Par-1, Jun  
92 kinase (JNK), and the p21-activated kinase Pak3, as well as phosphorylated substrate proteins  
93 such as the Myo-II regulatory light chain (MRLC; *Drosophila* Spaghetti squash, Sqh) and  
94 Moesin regulate different aspects of border cell migration<sup>15,23,28,29</sup>. In contrast, the serine-  
95 threonine phosphatases that counteract these and other kinases and phosphorylation events have  
96 not been extensively studied, either in border cells or in other cell collectives. Pp1 is a highly  
97 conserved and ubiquitous serine-threonine phosphatase found in all eukaryotic cells<sup>30,31</sup>. Pp1 can  
98 directly dephosphorylate substrates *in vitro*, but specificity for phosphorylated substrates *in vivo*  
99 is generally conferred by a large number of regulatory subunits (also called Pp1-interacting  
100 proteins [PIPs]). These regulatory subunits form functional Pp1 complexes through binding to  
101 the Pp1 catalytic (Pp1c) subunits and mediate the recruitment of, or affinity for, particular  
102 substrates<sup>31,32</sup>. Thus, despite the potential for pleiotropy, Pp1 complexes have specific and  
103 precise cellular functions *in vivo*, that range from regulation of protein synthesis, cell division  
104 and apoptosis to individual cell migration<sup>33,34</sup>.

105           We now show that Pp1 activity controls multiple collective behaviors of border cells,  
106 including collective polarization, cohesion, cell-cell coordination, and migration. Remarkably,  
107 Pp1-inhibited border cells round up, break off from the main group, and move as single cells or  
108 small groups but are generally unable to complete their migration. We determine that Pp1  
109 controls the levels of E-Cadherin and  $\beta$ -Catenin, which are needed to retain border cells within a  
110 cohesive cluster. Additionally, Pp1 activity restricts F-actin and Myo-II enrichment to the outer  
111 edges of the cluster, maintaining a supracellular cytoskeletal ultrastructure and supporting  
112 polarized collective movement. Furthermore, the major Pp1 specific complex for Myo-II  
113 activity, myosin phosphatase, coordinates border cell shape and adherence of cells to the cluster.  
114 Our work thus identifies Pp1 activity, mediated through distinctive phosphatase complexes such  
115 as myosin phosphatase, as a critical molecular regulator of collective cell versus single cell  
116 behaviors in a developmentally migrating collective.

## 117 **Results**

### 118 **NiPp1 blocks border cell collective movement and cohesion *in vivo***

120 To address the role of phosphatases in border cell migration, we carried out a small-scale genetic  
121 screen to inhibit selected serine-threonine phosphatases that are expressed during oogenesis  
122 using RNAi as well as inhibitors that target catalytic subunits<sup>35</sup>. Inhibition of *Pp4-19C* (one  
123 RNAi line) and Pp1c, through overexpression of Nuclear inhibitor of Protein phosphatase 1  
124 (NiPp1), significantly disrupted border cell migration (Supplemental Table 1). NiPp1 is an  
125 endogenous protein that when overexpressed, effectively and specifically blocks Pp1 catalytic  
126 subunit activity *in vivo*<sup>36-39</sup>. Pp1 and associated complexes are important phosphatase regulators  
127 of many cellular processes. Moreover, females expressing NiPp1 driven by *c306-GAL4* did not  
128 produce adult progeny when crossed to wild-type males, consistent with infertility and

129 suggesting a role for Pp1 in normal oogenesis (Supplemental Figure 1A). Here we focused on  
130 further elucidating the function of Pp1 in border cells.

131 Expression of NiPp1 strongly disrupted both the ability of border cells to organize into a  
132 cohesive cluster and to migrate successfully (Figure 1G-J). Unlike control border cells, most  
133 NiPp1-expressing border cells failed to reach the oocyte by stage 10 (98%; Figure 1I).  
134 Importantly, NiPp1-expressing border cells were no longer found in one cohesive cluster.  
135 Instead, individual cells and smaller groups split off from the main cluster (Figure 1H). Whereas  
136 control border cells migrated as a single cohesive unit (“1 part”), NiPp1-expressing border cells  
137 split into two to three (55%), or more (40%), parts (Figure 1H,J). Migration and cluster cohesion  
138 defects were observed when NiPp1 was expressed early in both border cells and the central polar  
139 cells (*c306*-GAL4; Figure 1I,J; Supplemental Figure 1B) or later in just border cells (*slbo*-GAL4;  
140 Supplemental Figure 1C-G). We observed no defects when NiPp1 was expressed only in polar  
141 cells (*upd*-GAL4; Supplemental Figure 1C,H-K). Fragmentation of clusters, however, was  
142 stronger when NiPp1 was driven by *c306*-GAL4 rather than *slbo*-GAL4 (compare Figure 1J to  
143 Supplemental Figure 1G), possibly due to earlier and higher expression of *c306*-GAL4  
144 (Supplemental Figure 1B)<sup>40</sup>. Although polar cells are normally located at the center of the border  
145 cell cluster and maintain overall cluster organization<sup>16,41</sup>, individual NiPp1-expressing border  
146 cells could completely separate from polar cells as well as the other border cells (Supplemental  
147 Figure 1L-N). Finally, NiPp1 border cells appeared rounder than normal, indicating that  
148 individual cell shape regulation was altered (see below). Together, these results demonstrate that  
149 NiPp1 expression in border cells, but not polar cells alone, disrupts collective migration, cluster  
150 organization and adhesion.

151           Because very few border cells reached the oocyte, we investigated whether NiPp1-  
152   expressing border cells were correctly specified and functional. We first examined the expression  
153   of the transcription factor *Slbo*, the fly C/EBP homolog, which is required for border cell  
154   specification in response to JAK/STAT signaling<sup>40,42</sup>. NiPp1-expressing border cells generally  
155   expressed *Slbo*, similarly to control cells (Supplemental Figure 2A-B'; 30/33 border cells  
156   expressed *Slbo*, n = 6 egg chambers). Proper specification through JAK/STAT signaling restricts  
157   the number of follicle cells that become migrating border cells<sup>40,43</sup>. When NiPp1 expression was  
158   driven by *c306-GAL4*, the total number of cells in the cluster (border cells and polar cells) was  
159   slightly increased to a mean of seven NiPp1 cells compared to six control cells per cluster  
160   (Supplemental Figure 2C; n = 27 egg chambers for each genotype). This modest increase in cells  
161   per cluster is far fewer than what is observed upon ectopic activation of JAK/STAT<sup>40,43</sup>,  
162   suggesting that NiPp1 does not greatly impact the specification or recruitment of border cells.  
163   Thus, NiPp1 prevents properly specified border cells from staying together and completing  
164   migration.

165

### 166   **Live NiPp1 border cell clusters fall apart and move slowly**

167   To determine where and when NiPp1-expressing border cells stopped migrating and dissociated  
168   from the cluster, we examined border cell clusters using live time-lapse imaging<sup>17,44</sup>. Both  
169   control and NiPp1 border cells delaminated from the surrounding epithelium and began their  
170   migration as a group (Figure 1K-L''; Videos 1-4). NiPp1 border cells separated into multiple  
171   sub-collectives or single cells at various points during migration, particularly after moving  
172   between the nurse cells (Videos 2-4). NiPp1 border cells typically migrated as small groups but  
173   also could arrange themselves into co-linear chains (Video 3). A few NiPp1 border cells reached



174 the oocyte, although considerably later than control border cells. Indeed, NiPp1-expressing  
175 border cells migrated more slowly overall compared to control border cell clusters (~0.35  
176  $\mu\text{m}/\text{min}$  NiPp1 versus ~0.65  $\mu\text{m}/\text{min}$  control; Figure 1M). Individual NiPp1 border cells also  
177 moved at variable speeds, with lagging border cells sometimes pushing ahead of the nominal  
178 leading cell (Video 2). Labeling with a cortical cell membrane marker, PLC $\delta$ -PH-GFP (*slbo*-  
179 GAL4>UAS-PLC  $\delta$ -PH-GFP), allowed us to determine that some NiPp1 border cells completely  
180 disrupted their cell-cell contacts, whereas other border cells remained in contact (Video 5).  
181 Finally, single border cells that broke off from the cluster were frequently left behind and  
182 stopped moving forward, appearing to get “stuck” between nurse cells (Videos 2-4). Taken  
183 together, these data show that NiPp1 disrupts the ability of border cells to maintain a collective  
184 mode of migration, and leads to border cells now moving as single cells or small groups with  
185 slower speed that typically fail to reach the oocyte.

186

### 187 **NiPp1 inhibits the function of Pp1 catalytic subunits in border cells**

188 NiPp1 is a specific inhibitor of Pp1c activity *in vitro* as well as *in vivo*<sup>37-39</sup>. *Drosophila* has four  
189 Pp1c subunit genes<sup>45,46</sup>, whereas humans have three genes<sup>30</sup>. Pp1 $\alpha$ -96A, Flapwing (Flw), and  
190 Pp1-87B transcripts are each expressed at moderate-to-high levels in the adult ovary, whereas  
191 Pp1-13C RNA is mainly detected in adult males (<http://flybase.org>)<sup>47</sup>. We examined the  
192 localization of Pp1 $\alpha$ -96A using a genomic fosmid transgene in which the open reading frame of  
193 Pp1 $\alpha$ -96A is driven by its endogenous genomic regulatory regions and C-terminally tagged with  
194 GFP (“Pp1 $\alpha$ -96A-GFP”)<sup>48</sup>. Pp1 $\alpha$ -96A-GFP was detected in the cytoplasm, with higher levels at  
195 the cortical membranes of border cells, follicle cells, the oocyte, and nurse cells (Figure 2A-C).  
196 Endogenous Flw, as visualized using a functional in-frame YFP protein trap<sup>49</sup> (“Flw-YFP”), was

197 also expressed ubiquitously during the stages in which border cells migrate (Figure 2D-F).  
198 Specifically, Flw-YFP was enriched at the cell cortex and cytoplasm of all cells, including border  
199 cells. Due to lack of specific reagents, we were unable to determine whether Pp1-87B or Pp1-  
200 13C proteins are present in border cells. Therefore, at least two Pp1c subunit proteins are  
201 expressed in border cells throughout their migration.

202 We next determined whether NiPp1 specifically inhibited Pp1c activity in border cells.  
203 Overexpression of each of the four *Drosophila* Pp1c subunits individually did not impair border  
204 cell migration (Supplemental Figure 3A-E). When co-expressed with NiPp1, two of the catalytic  
205 subunits, Pp1 $\alpha$ -96A and Pp1-87B, strongly suppressed the migration defects caused by NiPp1,  
206 with 90% (NiPp1 + Pp1 $\alpha$ -96A) and 80% (NiPp1 + Pp1-87B) of border cells now reaching the  
207 oocyte compared to 40% with NiPp1 alone (NiPp1 + RFP; Figure 2G; Supplemental Figure 3F-  
208 H). Co-expression of Pp1 $\alpha$ -96A and Pp1-87B partially suppressed the NiPp1-induced cluster  
209 fragmentation, leading to 55% (NiPp1 + Pp1 $\alpha$ -96A) and 65% (NiPp1 + Pp1-87B) of border cell  
210 clusters now found intact compared to ~10% with NiPP1 alone (NiPp1 + RFP; Figure 2H;  
211 Supplemental Figure 3F-H). Flw and Pp1-13C only mildly suppressed the NiPp1-induced cluster  
212 splitting and migration defects (Figure 2G,H; Supplemental Figure 3I,J). The observed  
213 phenotypic suppressions were likely due to titration of NiPp1 inhibitory activity by excess Pp1c  
214 protein, in agreement with previous studies in *Drosophila*<sup>36,38</sup>. Co-expression of a human Pp1c  
215 homolog (“hPPP1CC”) fully suppressed the NiPp1-induced phenotypes and did not disrupt  
216 migration when expressed on its own (Figure 2G,H; Supplemental Figure 3E,K). hPPP1CC has  
217 strong homology to Pp1-87B (93% identical, 96% similar), Pp1 $\alpha$ -96A (89% identical, 94%  
218 similar), and Pp1-13C (91% identical, 95% similar), although further analysis through the  
219 DIOPT (*Drosophila* RNAi Screening Center Integrative Ortholog Prediction Tool) database

220 suggests higher homology to Pp1-87B and Pp1 $\alpha$ -96A (<http://flybase.org/>)<sup>50</sup>. The suppression by  
221 multiple Pp1 proteins and full suppression by hPPP1CC suggests that Pp1 catalytic subunit genes  
222 have overlapping functions in border cells.

223 To better understand how NiPp1 inhibits Pp1 activity in border cells, we next analyzed  
224 the subcellular localization of Flw-YFP and Pp1 $\alpha$ -96A-GFP when NiPp1 was co-expressed.  
225 Pp1 $\alpha$ -96A-GFP and Flw-YFP normally localize to the cortical membrane and cytoplasm of  
226 border cells (Figure 2A-F). Upon co-expression with NiPp1, however, Flw-YFP and Pp1 $\alpha$ -96A-  
227 GFP were now primarily localized to border cell nuclei along with NiPp1 (HA-tagged NiPp1;  
228 Supplemental Figure S4A-B”). These results suggest that ectopic NiPp1, in addition to directly  
229 inhibiting Pp1c activity<sup>37,38,51</sup>, also sequesters PP1 catalytic subunits in the nucleus.

230

### 231 **Pp1c genes are required for border cell cluster migration and cohesion**

232 To determine whether Pp1 catalytic activity itself is required for border cell migration, we next  
233 downregulated the *Pp1c* genes by driving the respective UAS-RNAi lines in border cells and  
234 polar cells with *c306*-GAL4 (Figure 3A-D). RNAi lines that target 3 of the 4 catalytic subunits  
235 (Pp1 $\alpha$ -96A, Pp1-87B, and Pp1-13C) strongly disrupted border cell migration (Figure 3B-E).  
236 Knockdown of *Pp1c* genes also caused  $\geq 50\%$  of border cell clusters to dissociate into multiple  
237 sub-clusters and single cells (Figure 3B-D,F). Using live imaging, we confirmed that decreased  
238 levels of Pp1 $\alpha$ -96A, Pp1-87B, and Pp1-13C by RNAi altered border cell migration and caused  
239 cells to split from the main cluster (Figure 3G; Videos 6-9). Multiple *flw* RNAi lines (see  
240 Materials and Methods) did not impair migration or cluster cohesion when expressed in border  
241 cell clusters. However, RNAi does not always fully knock down gene function in cells<sup>52</sup>. As  
242 complete loss of *flw* is homozygous lethal, we generated border cells that were mosaic mutant for

243 the strong loss of function allele *flw<sup>FP41</sup>* [ref 53]. Mosaic *flw<sup>FP41</sup>* border cell clusters were  
244 typically composed of a mixture of wild-type and mutant cells and frequently fell apart, with  
245 ~90% splitting into two or more parts (Figure 3H-I; Supplemental Figure 4C-C’). In egg  
246 chambers with *flw* mutant border cells, 40% of border cells did not migrate at all whereas 20% of  
247 border cells partially migrated but did not reach the oocyte (Figure 3H-H’,J; Supplemental  
248 Figure 4C-C’). NiPp1 expression results in more severe phenotypes than RNAi knockdown, or  
249 loss, of individual *Pp1c* genes, suggesting that Pp1c subunits have distinct and overlapping  
250 functions in border cell cohesion and migration.

251

### 252 **Pp1 promotes cadherin-catenin complex levels and adhesion of border cells**

253 One of the strongest effects of decreased Pp1c activity was the dissociation of border cells from  
254 the cluster. In many cell collectives, cadherins critically mediate the attachment of individual  
255 cells to each other during migration, although other cell-cell adhesion proteins can also  
256 contribute<sup>9,54</sup>. The cadherin-catenin complex members E-Cadherin (*Drosophila* Shotgun; Shg),  
257  $\beta$ -Catenin (*Drosophila* Armadillo; Arm) and  $\alpha$ -Catenin are all required for border cell  
258 migration<sup>16,41,55-57</sup>. E-Cadherin, in particular, is required for traction of border cells upon the  
259 nurse cell substrate, for producing overall front-rear polarity within the cluster, and for  
260 attachment of border cells to the central polar cells<sup>16,41</sup>. Complete loss of cadherin-catenin  
261 complex members in border cells prevents any movement between nurse cells<sup>41,55,56</sup>. This has  
262 precluded a definitive analysis of whether all, or some, complex members promote adherence of  
263 border cells to the polar cells and/or to other border cells.

264 To determine whether adhesion of border cells to the cluster requires a functional  
265 cadherin-catenin complex, we used *c306*-GAL4 to drive RNAi for each gene in all cells of the

266 cluster (polar cells and border cells; Supplemental Figure 1B). Multiple non-overlapping RNAi  
267 lines for E-Cadherin,  $\beta$ -Catenin, and  $\alpha$ -Catenin each reduced the respective endogenous protein  
268 levels and disrupted border cell migration, in agreement with previous results that used mutant  
269 alleles (Figure 4A-E,G,I; Supplemental Figure 5A-F')<sup>41,55,57</sup>. Importantly, RNAi knockdown for  
270 each of the cadherin-catenin complex genes, driven in both polar cells and border cells, resulted  
271 in significant fragmentation of the border cell cluster compared to controls. E-Cadherin (40-  
272 50%) and  $\beta$ -Catenin (55-80%) RNAi lines exhibiting stronger, while  $\alpha$ -Catenin RNAi lines  
273 exhibited milder (~20-30%), cluster fragmentation (Figure 4A-D,F,H,J; Video 10). Dissociated  
274 RNAi border cells could localize to the side of the egg chamber (Figure 4B,D), although others  
275 remained on the normal central migration pathway (Figure 4C,D). While  $\alpha$ -Catenin RNAi  
276 knockdown in polar cells alone (*upd-GAL4*) caused border cell cluster splitting and migration  
277 defects, this effect was significantly milder than the effects of  $\alpha$ -Catenin knockdown in both  
278 polar cells and border cells (compare Figure 4I,J to Supplemental Figure 5G,H). These results  
279 indicate that the cadherin-catenin complex keeps border cells attached to each other and to the  
280 polar cells, which in turn maintains a cohesive cluster.

281 We next wanted to determine whether Pp1 regulated these adhesion proteins in border  
282 cells. We analyzed the levels and localization of E-Cadherin and  $\beta$ -Catenin at cell-cell contacts  
283 in NiPp1-expressing border cell clusters that were still intact or loosely connected (Figure 4K-P).  
284 In wild-type clusters, E-Cadherin and  $\beta$ -Catenin are highly enriched at cell contacts between  
285 border cells (BC-BC) and between border cells and polar cells (BC-PC; Figure 4K-K'',M-M'').  
286 NiPp1-expressing border cell clusters exhibited reduced levels of E-Cadherin and  $\beta$ -Catenin at  
287 most BC-BC contacts (Figure 4L-L'',N-N''). Pp1-inhibited polar cells generally retained E-  
288 Cadherin and  $\beta$ -Catenin, which was higher compared to border cells (Figure 4L-L'',N-N''). We

289 quantified the relative levels of E-Cadherin (Figure 4O) and  $\beta$ -Catenin (Figure 4P) at BC-BC  
290 contacts in control versus NiPp1 clusters, normalized to the levels of those proteins at nurse cell-  
291 nurse cell junctions. Both E-Cadherin and  $\beta$ -Catenin were reduced by almost half compared to  
292 matched controls. These data together suggest that Pp1 activity regulates cadherin-catenin  
293 proteins at cell-cell contacts, which contributes to adhesion of border cells within the cluster.

294

### 295 **Pp1 activity promotes protrusion dynamics but is dispensable for directional migration**

296 Border cells with impaired Pp1 activity migrated significantly slower than control clusters  
297 (Figures 1M, 3G), suggesting that border cell motility was altered. Migrating cells form actin-  
298 rich protrusions at the front, or leading edge, which help anchor cells to the migratory substrate  
299 and provide traction for forward movement<sup>58,59</sup>. In collectives, protrusive leader cells also help  
300 sense the environment to facilitate directional migration<sup>8</sup>. Border cells typically form one or two  
301 major protrusions at the cluster front<sup>17,19,22</sup> (Figure 5A-A''',C; Supplemental Figure 6A; Video  
302 6). Pp1-inhibited border cells (Pp1c RNAi) still extended forward-directed protrusions (Figure  
303 5A-C; Videos 7-9). Additionally, the numbers, lifetimes, lengths and areas of side- and back-  
304 directed protrusions were not generally increased in Pp1-inhibited border cell clusters compared  
305 to control (Figure 5C-F; Supplemental Figure 6B,C). However, the number of protrusions  
306 produced at the front of the cluster was reduced in Pp1 RNAi border cells (range of 0.5-0.85  
307 mean protrusions per frame, all genotypes) compared to control (1.0 mean protrusions per frame;  
308 Figure 5C). Additionally, the lifetimes of Pp1 RNAi forward-directed protrusions were reduced  
309 (Figure 5D). Control protrusions at the cluster front had a lifetime of ~18 min, whereas Pp1-  
310 inhibited front protrusions persisted for 5-10 min. These short-lived Pp1 RNAi protrusions were  
311 also reduced in length, from a third to half the size of control front-directed protrusions (Figure

312 5E; Supplemental Figure 6B). Further, Pp1-inhibited front protrusions were smaller, with a mean  
313 area of  $\sim 10\text{-}20\mu\text{m}^2$  compared to the control mean of  $\sim 40\mu\text{m}^2$  (Figure 5F; Supplemental Figure  
314 6C). Thus, Pp1 activity promotes normal protrusion dynamics, including the number, lifetime  
315 and size of front-directed protrusions.

316 NiPp1 and Pp1c RNAi border cells followed the normal migratory pathway down the  
317 center of the egg chamber between nurse cells, even when cells broke off from the main cluster  
318 (Figures 1H, L-L' and 3B-D; Videos 2-5, 7-9). Moreover, in Pp1 RNAi border cells, front-  
319 directed protrusions still formed though with altered dynamics. These observations together  
320 suggest that Pp1 activity is not required for directional migration. To further test this idea, we  
321 made use of a Förster Resonance Energy Transfer (FRET) activity reporter for the small GTPase  
322 Rac. Normally, high Rac-FRET activity occurs at the cluster front during early migration in  
323 response to guidance signals from the oocyte, and correlates with protrusion extension  
324 (Supplemental Figure 6D)<sup>22</sup>. Under conditions of PP1-inhibition, the most severely affected  
325 clusters fall apart, sometimes on different focal planes. This potentially complicates  
326 interpretation of Rac-FRET signals. We therefore measured Rac-FRET only in those NiPp1-  
327 expressing border cell clusters that remained intact. We detected elevated Rac-FRET activity in  
328 NiPp1 border cells similar to control, indicating that Rac activity was largely preserved although  
329 with slightly elevated levels (Supplemental Figure 6D,E). In sum, these data indicate that Pp1  
330 activity influences protrusion dynamics and cell motility, but does not appear to be critical for  
331 directional orientation of the cluster to the oocyte.

332

333 **Pp1 promotes border cell shape through collectively polarized F-actin and Myo-II**

334 Migrating cells, including cell collectives, change shape to facilitate their movement through  
335 complex tissue environments<sup>60</sup>. Some cells maintain a single morphology, such as an elongated  
336 mesenchymal or rounded amoeboid shape, throughout migration, whereas other cells  
337 interconvert from one shape to another as they migrate. The border cell cluster overall is  
338 rounded, although individual border cells within the group appear slightly elongated (Figure  
339 6A,A'; Videos 1 and 6)<sup>24</sup>. However, NiPp1 border cells, whether present in small groups or as  
340 single cells, were visibly rounder than control border cells (Figure 1H,L-L'; Videos 1-4). We  
341 observed similar cell rounding when the *Pp1c* genes were knocked down by RNAi, although  
342 some border cells appeared more noticeably round than others (Figures 3B-D, 5B-B''''; Videos 7-  
343 9). To quantify these altered cell shapes, we expressed the membrane marker PLC  $\delta$ -PH-GFP to  
344 visualize individual cells within the cluster and measured "circularity", which indicates how well  
345 a shape approaches that of a perfect circle (1.0; Figure 6A-C). Control border cells overall were  
346 slightly elongated with a mean of  $\sim 0.7$ , although the circularity of individual cells varied  
347 substantially (range of  $\sim 0.4$  to 0.95), suggesting that border cells undergo dynamic shape  
348 changes during migration (Figure 6C). In contrast, NiPp1 border cells were rounder, with a mean  
349 of  $\sim 0.9$ , and exhibited less variation than control (range of  $\sim 0.7$  to 1.0; Figure 6C).

350 The rounder cell shapes suggested that Pp1 inhibition alters the cortical cytoskeleton of  
351 the border cells. Wild-type border cells exhibit a marked enrichment of F-actin at the cluster  
352 periphery, whereas lower levels are detected inside the cluster at contacts between border cells  
353 (Figure 6D,D',F; Video 11)<sup>25,61</sup>. Upon Pp1 inhibition, F-actin now accumulated around each  
354 individual border cell, especially at BC-BC membrane contacts, rather than just being enriched at  
355 outer cluster surfaces (Figure 6E,E',G; Video 12). Similarly, Myo-II as visualized by GFP-  
356 tagged Spaghetti Squash (Sqh-GFP), the *Drosophila* homolog of the myosin regulatory light



357 chain (MRLC), is highly dynamic and normally concentrates at the outer periphery of live border  
358 cell clusters both during early (Figure 6H-H''''''; Video 13) and later stages of migration  
359 (Supplemental Figure 7A-A''''''; Video 15)<sup>24,26,28</sup>. In NiPp1 border cells, however, Sqh-GFP  
360 accumulated more uniformly at the cortical membranes of each border cell especially during  
361 early migration (Figure 6I-I''''''; Video 14), but also at later stages (Supplemental Figure 7B-  
362 B''''''; Video 16). Thus, inhibition of Pp1 converts collectively polarized F-actin and Myo-II to  
363 that characteristic of single migrating cells. As a result, individual border cells now have  
364 enriched actomyosin localization consistent with elevated cortical contractility at the single cell  
365 level.

366

### 367 **Pp1 promotes actomyosin contractility in border cells through myosin phosphatase**

368 Rok and other kinases phosphorylate the Myo-II regulatory light chain Sqh<sup>62</sup>. This leads to fully  
369 activated Myo-II, which then forms bipolar filaments, binds to F-actin, and promotes cell  
370 contractility. Given the altered distribution of Sqh-GFP when Pp1 was inhibited, we next  
371 analyzed the levels and distribution of active Myo-II. We used an antibody that recognizes  
372 phosphorylated Sqh at the conserved Ser-21 (mammalian MRLC Ser-19)<sup>28</sup>. Control border cells  
373 exhibit p-Sqh signal at the cluster periphery (Figure 7A, A'), closely resembling the pattern of  
374 Sqh-GFP in live wild-type border cells (Figure 6H-H''''''<sup>24,28</sup>). NiPp1 border cells, however, had  
375 high levels of p-Sqh distributed throughout the cluster including at internal BC-BC contacts  
376 (Figure 7B, B'), similar to Sqh-GFP in live NiPp1 border cells (Figure 6I-I''''''). These data  
377 support the idea that Pp1 inhibition elevates myosin activation.

378 Myo-II undergoes cycles of activation and inactivation via phosphorylation and  
379 dephosphorylation, respectively, to generate dynamic cellular contraction *in vivo*<sup>62</sup>. We

380 previously showed that waves of dynamic Myo-II maintain the collective morphology of border  
381 cells to facilitate movement through the egg chamber<sup>24</sup>. The myosin phosphatase complex  
382 consists of a Pp1c subunit and a specific regulatory subunit, the myosin binding subunit (Mbs;  
383 also called myosin phosphatase-targeting subunit [MYPT]), which together dephosphorylate Sqh  
384 and inactivate Myo-II<sup>63</sup>. Previously, we found that Mbs was required for border cell cluster  
385 delamination from the epithelium and cell shape<sup>24,28</sup>. We therefore wanted to determine whether  
386 myosin phosphatase contributed to the above-described Pp1 functions in cell shape, cluster  
387 cohesion and migration. First, we confirmed that Mbs transcript and protein were expressed in  
388 border cells throughout migration (Supplemental Figure 8A-F). Mbs protein colocalized with  
389 Pp1c subunits near border cell membranes and in the cytoplasm (Supplemental Figure 8G-I”). In  
390 general, Mbs colocalized more extensively with Flw-YFP than with Pp1 $\alpha$ -96A-GFP  
391 (Supplemental Figure 8G-J). Next, we analyzed the functions of Mbs in border cells using an  
392 RNAi line that specifically reduced endogenous levels of Mbs (Supplemental Figure 8K-L”).  
393 Border cells deficient for Mbs were rounder than control border cells, exhibited incomplete  
394 migration (~30%), and separated from the cluster (60%) along the migration pathway (Figure  
395 7C-F). These findings indicate that myosin phosphatase, a specific Pp1 complex, promotes the  
396 normal cell morphology and collective cohesion of border cells, in addition to helping border  
397 cells migrate successfully to the oocyte.

398 RhoA activates Rho-associated kinase (Rok), thus leading to activation of Myo-II<sup>62</sup>. We  
399 and others previously found that expression of constitutively-activated RhoA (*Drosophila* Rho1)  
400 causes markedly rounder border cells and alters the distribution of F-actin and Myo-II at cell-cell  
401 contacts between border cells<sup>24,26</sup>. We therefore investigated whether Pp1 regulated RhoA  
402 activity in migrating border cells. We used a FRET construct that was recently shown to

403 specifically report RhoA activity in ovarian follicle cells<sup>64</sup>. Inhibition of Pp1 by NiPp1  
404 moderately increased the overall levels of Rho-FRET in intact border cell clusters compared to  
405 control border cells (Supplemental Figure 9A-C). These data suggest a general upregulation of  
406 the RhoA pathway upon Pp1 inhibition.

## 407 408 **Discussion**

409 To migrate collectively, cells need to coordinate and cooperate at the multicellular level.  
410 Individual cells within a group must remain together, maintain optimal cell shapes, organize  
411 motility of neighboring cells, and polarize. The mechanisms that globally orchestrate single cell  
412 behaviors within migrating cell collectives are still unclear. Here we report that Pp1 activity is a  
413 critical regulator of key intra- and intercellular mechanisms that together produce collective  
414 border cell migration. Loss of Pp1 activity, through overexpression of NiPp1 or Pp1c RNAi,  
415 switches border cells from migrating as a cohesive cluster to moving as single cells or in small  
416 groups (Figure 8A). A critical aspect of this switch is the redistribution of enriched F-actin and  
417 Myo-II to cell contacts between individual border cells, rather than at the cluster periphery, and a  
418 concomitant loss of adhesion between cells. We identified one key Pp1 phosphatase complex,  
419 myosin phosphatase, that controls collective-level myosin contraction (Figure 8B). Additional  
420 phosphatase complexes, through as-yet-unknown regulatory subunits, likely function in border  
421 cells to generate collective F-actin organization, maintain cell-cell adhesions, and potentially to  
422 restrain overall RhoA activity levels. Our results support a model in which balanced Pp1 activity  
423 promotes collective border cell cluster migration by coordinating single border cell motility and  
424 keeping the cells together (Figure 8A).

425 Many collectively migrating cells require a supracellular enrichment of actomyosin at the  
426 group perimeter to help organize their movement<sup>7,10-12</sup>. Active Myo-II is required for border cell

427 collective detachment from the epithelium, cluster shape, rotational movement of the cluster, and  
428 normal protrusion dynamics<sup>24,26,28,65</sup>. We show here that Pp1 organizes collective-level Myo-II-  
429 contractility during border cell migration. Inhibition of Pp1 shifts the balance of activated Myo-II  
430 from the cluster-level to individual border cells, resulting in rounded, hyper-contractile border  
431 cells that dissociate from the cluster. The myosin-specific Pp1 complex, myosin phosphatase,  
432 directly dephosphorylates Sqh and inhibits Myo-II activation<sup>63</sup>. Depletion of Mbs, the myosin-  
433 binding regulatory subunit of myosin phosphatase, causes rounder border cells and fragmentation  
434 of the cluster. We previously found that Mbs-deficient border cells have significantly higher  
435 levels of phosphorylated Sqh<sup>28</sup>. Thus, myosin phosphatase inhibits Myo-II activation to promote  
436 coordinated collective contractility of border cells. Myosin phosphatase is a downstream target  
437 of Rok, which phosphorylates and inhibits the Mbs subunit<sup>66</sup>. Consistent with loss of myosin  
438 phosphatase activity, Pp1-inhibition increases phosphorylated active Sqh at internal border cell  
439 junctions within the cluster. Thus, myosin phosphatase, downstream of Rok, promotes elevated  
440 active Myo-II and cortical contraction of the entire collective (Figure 8B). Interestingly,  
441 expression of constitutively activated RhoA also induces cellular hypercontractility, resulting in  
442 amoeboid-like round border cells<sup>24,26</sup>. RhoA activates Rok, which directly phosphorylates and  
443 activates the Myo-II regulatory subunit Sqh<sup>67,68</sup>. We observed somewhat elevated RhoA activity  
444 in the absence of Pp1 activity. Thus, Pp1 may also restrain the overall levels of RhoA activity in  
445 border cells through an unknown Pp1 complex, which would further promote the collective  
446 actomyosin contraction of border cells (Figure 8B).

447 Myo-II is activated preferentially at the cluster periphery and not between internal border  
448 cell contacts. Mbs and at least one catalytic subunit, Flw, localize uniformly in border cells, both  
449 on the cluster perimeter and between cells. Such uniform phosphatase distribution would be

450 expected to dephosphorylate and inactivate Myo-II everywhere, yet phosphorylated Sqh is only  
451 absent from internal cluster border cell contacts. Rok phosphorylates and inactivates Mbs in  
452 addition to directly activating Myo-II<sup>66</sup>. Our previous results indicate that Rok localizes to the  
453 cluster perimeter similar to p-Sqh, but there appeared to be overall less Rok between border  
454 cells<sup>24</sup>. Thus, spatially localized Rok could inhibit myosin phosphatase and activate Myo-II  
455 preferentially at the outer edges of the cluster (Figure 8A). Other mechanisms likely contribute to  
456 collective polarization of Myo-II. For example, during border cell detachment from the  
457 epithelium the polarity kinase Par-1 phosphorylates and inactivates Mbs at the cluster rear  
458 resulting in increased active Myo-II, whereas the Hippo pathway prevents accumulation of  
459 phosphorylated Myo-II between border cells<sup>25,28</sup>.

460 Our data also support a role for Pp1 in controlling F-actin stability, dynamics, and spatial  
461 organization. Similar to the pattern of activated Myo-II, cortical F-actin is normally high at the  
462 cluster periphery, although low levels are found between border cells<sup>23,25,61</sup>. Reduced Pp1  
463 activity causes high levels of F-actin to redistribute from the cluster perimeter to surround entire  
464 cell cortices of individual border cells. In migrating cells, networks of F-actin produce forces  
465 essential for protrusion extension and retraction dynamics that generate forward movement<sup>58,59</sup>.  
466 Further supporting a role for Pp1 in regulating F-actin, Pp1-inhibited border cells extend fewer  
467 protrusions with shorter lifetimes, resulting in altered motility patterns. How Pp1 promotes F-  
468 actin organization and dynamics is unknown. One possibility comes from the known function for  
469 Rok in regulating F-actin through the downstream effector LIM Kinase (LIMK)<sup>69</sup>. LIMK  
470 phosphorylates and inhibits cofilin, an actin severing and depolymerizing factor<sup>70</sup>. In border  
471 cells, cofilin restrains F-actin levels throughout the cluster and increases actin dynamics,  
472 resulting in normal cluster morphology and major protrusion formation<sup>71</sup>. Although cofilin

473 dephosphorylation, and thus activation, is typically mediated by the dual-specificity phosphatase  
474 Slingshot<sup>70</sup>, Pp1-containing complexes have been shown to dephosphorylate cofilin in a variety  
475 of cell types<sup>72-75</sup>. Additionally, RhoA activates formin proteins such as Diaphanous, which  
476 nucleate actin to form long filaments<sup>76</sup>. There are at least seven formin-related proteins in  
477 *Drosophila*, several of which have domains associated with activation by Rho GTPases.  
478 However, which formin, if any, promotes border cell migration and F-actin distribution is  
479 unknown. Further work will be needed to determine whether any of these potential targets, or  
480 other actin regulatory proteins, control collective level F-actin enrichment via Pp1.

481         A major consequence of decreased Pp1 activity is fragmentation of the border cell cluster  
482 into single border cells and small groups. This raises the question of how Pp1 activity maintains  
483 cluster cohesion, which is critical for collective cell movement *in vivo*. Like many cell  
484 collectives, high levels of cadherin-catenin complex proteins are detected between all border  
485 cells<sup>9,41</sup>. We found that Pp1 maintains E-Cadherin and  $\beta$ -Catenin levels between border cells.  
486 Thus, cluster fragmentation upon Pp1 inhibition could at least partly be due to deficient  
487 cadherin-catenin adhesion. The cadherin-catenin complex is required for border cells to adhere to  
488 the central polar cells as well as to provide migratory traction of the entire cluster upon the nurse  
489 cells<sup>16,41</sup>. Our results indicate that E-Cadherin,  $\beta$ -Catenin, and  $\alpha$ -Catenin maintain adhesion of  
490 border cells to each other in addition to the polar cells. Knockdown of the cadherin-catenin  
491 complex members in both border cells and polar cells causes border cells to significantly  
492 dissociate from the cluster. The requirement for cadherin-catenin in cluster cohesion may have  
493 been masked in prior studies due to the inability of loss-of-function cadherin-catenin mutant  
494 border cells to move at all<sup>16,41,55,56</sup>. While RNAi for E-Cadherin,  $\beta$ -Catenin, and  $\alpha$ -Catenin each  
495 strongly knock down the respective protein levels, it may be that a small amount of each protein

496 is still present. Such remaining cadherin-catenin proteins may provide just enough traction for  
497 border cells to partially migrate upon the nurse cells. We speculate that movement of cadherin-  
498 catenin-deficient border cells within the confining tissue would provide mechanical stresses that  
499 break the cluster apart at weakened border cell-border cell contacts. Indeed, a mutant  $\alpha$ -Catenin  
500 protein that lacks part of the C-terminal F-actin-binding domain was shown to partially rescue  
501 the migration defects caused by loss of  $\alpha$ -Catenin; however, these rescued border cell clusters  
502 split into several parts along the migration path<sup>56</sup>. Further supporting this idea, Pp1-inhibited  
503 border cells fall apart during their effort to migrate between the nurse cells.

504         How does Pp1 promote cluster cohesion? Given the effects of Pp1 on E-Cadherin and  $\beta$ -  
505 Catenin at internal border cell contacts, and the requirement for cadherin-catenin complex  
506 proteins in maintaining cluster integrity, Pp1 could directly regulate cadherin-catenin protein  
507 stability and/or adhesive strength. In mammalian and *Drosophila* cells, phosphorylation of a  
508 conserved stretch of serine residues in the E-Cadherin C-terminal tail region regulates E-  
509 Cadherin protein stability, binding of E-Cadherin to  $\beta$ -Catenin, and cell-cell junction formation  
510 and turnover<sup>77-79</sup>. Serine-phosphorylation of  $\alpha$ -Catenin is also required for adhesion between  
511 epithelial cells and may be required for efficient border cell migration<sup>80</sup>. More work will be  
512 needed to determine whether a to-be-identified Pp1-containing phosphatase complex directly  
513 dephosphorylates E-Cadherin and/or  $\alpha$ -Catenin, as the roles for phosphatases in cadherin-catenin  
514 junctional stability are still poorly understood. Alternatively, or in addition, Pp1 regulation of  
515 collective actomyosin contraction at the cluster periphery could allow internal cluster cell-cell  
516 junctions to be maintained. Pp1-inhibition greatly alters actomyosin distribution, causing  
517 individual border cells to contract and round up. The forces transmitted by high cell contractility  
518 alone could weaken adherens junctions, causing the border cells to break apart during migration

519 (Figure 8A). Myosin phosphatase-depleted border cells, which have elevated phosphorylated  
520 Sqh<sup>28</sup> and thus active Myo-II, are highly contractile, round up, and fall off the cluster. Thus,  
521 collective-level active actomyosin contraction contributes to keeping border cells adhered to the  
522 cluster. Of note, Myo-II and cadherin-catenin complexes have dynamic and quite complex  
523 interactions that influence stability of cell-cell junctions, and which may depend on cellular  
524 context<sup>81,82</sup>. NiPp1 expression disrupts cluster cohesion to a greater extent than knockdown of  
525 either myosin phosphatase or cadherin-catenin complex members alone. This suggests that  
526 cadherin-catenin phosphorylation and optimal actomyosin activity both contribute to cluster  
527 cohesion through distinct Pp1 phosphatase complexes, although this possibility remains to be  
528 formally tested (Figure 8B).

529 Our study implicates Pp1 as a key regulator of collective cohesion and migration in  
530 border cells. Pp1 catalytic subunits and their regulatory subunits are conserved across  
531 eukaryotes<sup>30-32,34</sup>. The roles of specific Pp1 complexes in collective cell migration during  
532 development and in cancer have not been well studied. Intriguingly, Mypt1 (Mbs homolog)  
533 promotes polarized mesodermal migration during zebrafish gastrulation<sup>83</sup>. Similar to what we  
534 observe in Mbs-depleted border cells, inhibition of zebrafish Mypt1 switched cells from an  
535 elongated mesenchymal mode of migration to a hyper-contractile amoeboid mode of migration.  
536 Another Pp1 phosphatase complex containing the Phacr4 (phosphatase and actin regulator 4)  
537 regulatory subunit promotes the chain-like collective migration of enteric neural crest cells,  
538 which colonize the gut and form the enteric nervous system during development<sup>74</sup>. Phacr4,  
539 through Pp1, specifically controls the directed migration and shape of enteric neural crest cells  
540 through integrin, Rok, and cofilin. Given the conservation of these and other phosphatase



541 complexes, our study highlights the importance of balanced Pp1 phosphatase activity in the  
542 organization and coordination of migrating cell collectives.

543

## 544 **Materials and Methods**

### 545 **Drosophila genetics and strains**

546 Crosses were generally set up at 25°C unless otherwise indicated. The *tub*-GAL80<sup>ts</sup> (“tsGAL80”) transgene<sup>84</sup> was included in many crosses to suppress GAL4-UAS expression during earlier stages of development; these crosses were set up at 18°-22°C to turn on tsGAL80. For *c306*-GAL4, *c306*-GAL4-tsGal80, *slbo*-GAL4, or *upd*-GAL4 tsGAL80 crosses, flies were incubated at 549 29°C for ≥ 14 h prior to dissection to produce optimal GAL4-UAS transgene expression. *c306*-GAL4 is expressed early and more broadly in border cells, polar cells, and terminal (anterior and 552 posterior) follicle cells (Supplemental Figure 1B)<sup>40</sup>. During oogenesis, *slbo*-GAL4 turns on later than *c306*-GAL4, and is expressed in border cells but not polar cells, as well as a few anterior 554 and posterior follicle cells at stage 9 (Supplemental Figure 1C,D)<sup>40,85</sup>. *upd*-GAL4 is restricted to polar cells at all stages of oogenesis (Supplemental Figure 1C,H)<sup>16</sup>. Mosaic mutant clones of *flw* 556 were generated using the FLP-FRT system<sup>86</sup>. The *flw*<sup>FP41</sup> FRT 19A line was crossed to *ubi*-mRFP.nls *hsFLP* FRT19A; the resulting progeny were heat shocked for 1 h at 37°C, two times a 558 day for 3 d, followed by 3 d at 25°C prior to fattening and dissection. Mutant clones were 559 identified by loss of nuclear RFP signal from *ubi*-mRFP.nls.

560 The following *Drosophila* strains (with indicated stock numbers) were obtained from the  
561 Bloomington Drosophila Stock Center (BDSC, Bloomington, IN, USA): *c306*-GAL4 (3743),  
562 UAS-NiPp1.HA (23711), UAS-Pp1-87B.HA (24098), UAS-Pp1-13C.HA (23701), UAS-Pp1 $\alpha$ -  
563 96A.HA (23700), UAS-hPPP1CC (64394), UAS-mCD8.ChRFP (27392), UAS-mCherry RNAi

564 (35785), UAS-Pp2B-14D RNAi (25929, 40872), UAS-mts RNAi (27723, 38337, 57034, 60342),  
565 UAS-Pp4-19C RNAi (27726, 38372, 57823), UAS-CanA-14F RNAi (38966), UAS-PpD3 RNAi  
566 (57307), UAS-PpV RNAi (57765), UAS-CanA1 RNAi (25850), UAS-CG11597 RNAi (57047,  
567 61988), UAS-rgdC RNAi (60076), UAS-Flw RNAi (38336), UAS- $\beta$ -Catenin RNAi JF01252  
568 (31305), *flw<sup>FP41</sup>* FRT 19A (51338), *ubi-mRFP.nls hsFLP FRT19A* (31418), UAS-PLC $\delta$ -PH-GFP  
569 (“membrane GFP”; 39693).

570 The following *Drosophila* strains (with indicated stock numbers) were obtained from the  
571 Vienna Drosophila Resource Center (VDRC, Vienna, Austria): UAS-Pp1 $\alpha$ -96A RNAi (v27673),  
572 UAS-Pp1-87B RNAi (v35024), UAS-Pp1-13C RNAi (v29058), UAS-Flw RNAi (v29622,  
573 v104677), UAS-Mbs RNAi (v105762), UAS-Pp2B-14D RNAi (v46873), UAS-Pp4-19c RNAi  
574 (25317), UAS-E-Cadherin RNAi (v27082, v103962), UAS- $\beta$ -Catenin RNAi (v107344), UAS- $\alpha$ -  
575 Catenin RNAi (v20123, v107298), *fTRG Pp1 $\alpha$ -96A* (v318084), *fTRG Sqh* (v318484),.

576 Other *Drosophila* strains used in this study were: *slbo*-GAL4, *slbo*-GAL4 UAS-  
577 *mCD8::GFP*, *upd*-GAL4;; *tsGAL80*, and *slbo*-LifeAct-GFP line 2M (from D. Montell,  
578 University of California, Santa Barbara, Santa Barbara, CA, USA), *flw<sup>CPTI002264</sup>* protein trap (line  
579 115284, Kyoto Stock Center, Kyoto, Japan), UAS-mCherry-Jupiter (from C. Doe, University of  
580 Oregon, Eugene, OR, USA), UAS-Rac FRET<sup>22</sup>, UAS-Rho FRET/CyO; UAS-Rho  
581 FRET/TM6B<sup>64</sup>, and UAS-Flw.HA (FlyORF)<sup>87</sup>. The *c306*-GAL4 *tsGAL80*<sup>24</sup> and *c306*-GAL4  
582 *tsGAL80/FM6*; UAS-NiPp1.HA/TM3 Ser stocks were created in our lab.

583

#### 584 **Female fertility test**

585 Fertility was determined according to established methods<sup>88</sup>. Briefly, four *c306*-GAL4  
586 *tsGAL80/FM6*; *Sco*/CyO (control) or *c306*-GAL4 *tsGAL80/FM6*; UAS-NiPP1/TM3 Ser

587 (experimental) females were outcrossed to four *w<sup>1118</sup>* males. The flies were allowed to mate for 2  
588 days followed by a 24 h egg lay at 30°C on fresh food medium supplemented with yeast. Adults  
589 were then removed and the progeny allowed to develop in the vial at 25°C; the food was  
590 periodically monitored to avoid drying out. Scoring of eclosed adult progeny from each vial was  
591 performed 16-20 d after egg laying and reported as the average progeny per female.

592

### 593 **Immunostaining**

594 Fly ovaries from 3- to 5-d-old females were dissected in Schneider's *Drosophila* Medium  
595 (Thermo Fisher Scientific, Waltham, MA, USA) supplemented with 10% fetal bovine serum  
596 (Seradigm FBS; VWR, Radnor, PA, USA). Ovaries were kept whole or dissected into individual  
597 egg chambers, followed by fixation for 10 min using 4% methanol-free formaldehyde  
598 (Polysciences, Warrington, PA, USA) in 0.1 M potassium phosphate buffer, pH 7.4, or in 1X  
599 Phosphate Buffered Saline (PBS). Washes and antibody incubations were performed in "NP40  
600 block" (50 mM Tris-HCl, pH 7.4, 150 mM NaCl, 0.5% NP40, 5 mg/ml bovine serum albumin  
601 [BSA]). For  $\alpha$ -Catenin immunostaining, dissected egg chambers were fixed for 20 min in 4%  
602 paraformaldehyde (Electron Microscopy Sciences, Hatfield, PA, USA) in potassium phosphate  
603 buffer, pH 7.4, followed by a separate blocking step for 30 min (2% BSA in 1x PBS) prior to  
604 each antibody incubation. For p-Sqh antibody staining, dissected stage 11 and older egg  
605 chambers were manually discarded to ensure that the signal in earlier stages was not diluted;  
606 overnight primary incubation at 4°C was performed with rocking. For the F-actin staining in  
607 Figure 6, the entire dissection procedure was performed in less than 10 min to preserve F-actin  
608 structures, followed by fixation in the presence of Phalloidin at 1:400 dilution; after washing off  
609 the fix, the egg chambers were incubated in Phalloidin at 1:400 for 2 h<sup>89</sup>.

610 The following primary antibodies from the Developmental Studies Hybridoma Bank  
611 (DSHB, University of Iowa, Iowa City, IA, USA) were used at the indicated concentrations: rat  
612 anti-E-Cadherin 1:10 (DCAD2), mouse anti-Fasciclin III 1:10 (FasIII; 7G10), mouse anti-Arm  
613 ( $\beta$ -Catenin) 1:75 (N2-7A1), concentrated rat anti- $\alpha$ -Catenin 1:1000 (DCAT1), mouse anti-Eyes  
614 Absent 1:100 (eya10H6), mouse anti-Lamin Dm0 1:10 (ADL67.10), and mouse anti-Singed 1:25  
615 (Sn7C). Additional primary antibodies used were: rabbit anti-Phospho-Myosin Light Chain 2  
616 (Ser19) 1:40 (#3671, Cell Science Technology, Danvers, MA, USA), rat anti-HA 1:1000  
617 (11867423001, Millipore Sigma, Burlington, MA, USA), rabbit anti-Mbs 1:200 (from C. Tan,  
618 University of Missouri, Columbia, MO, USA); rabbit anti-GFP polyclonal 1:1000-1:2000 (A-  
619 11122, Thermo Fisher Scientific), chicken anti-GFP polyclonal 1:1000 (ab13970, Abcam,  
620 Cambridge, MA, USA), rat anti-Slbo 1:2000 (from P. Rørth, Institute of Molecular and Cell  
621 Biology, Singapore). Alexa Fluor 488, 568, or 647 secondary antibodies (Thermo Fisher  
622 Scientific) were used at 1:400 dilution. Alexa Fluor Phalloidin (488 or 568; Thermo Fisher  
623 Scientific) and Phalloidin–Atto 647N (Millipore Sigma) were used at 1:400 dilution. 4',6-  
624 Diamidino-2-phenylindole (DAPI, Millipore Sigma) was used at 0.05  $\mu$ g/ml. Egg chambers were  
625 mounted on slides with Aqua-Poly/Mount (Polysciences) or FluorSave Reagent (Millipore  
626 Sigma) for imaging.

627

### 628 **Microscopy, live time-lapse imaging, and FRET**

629 Images of fixed egg chambers were acquired with an upright Zeiss AxioImager Z1 microscope  
630 and Apotome.2 optical sectioning, or on a Zeiss LSM 880 confocal microscope (KSU College of  
631 Veterinary Medicine Confocal Core), using either a 20 $\times$  0.75 numerical aperture (NA) or 40 $\times$  1.3  
632 NA oil-immersion objective.

633 Live time-lapse imaging was performed as described<sup>17,44</sup>. Briefly, ovarioles were  
634 dissected in room-temperature sterile live imaging media (Schneider's Drosophila Medium, pH  
635 6.95, with 15–20% FBS). Fresh live imaging media, supplemented with 0.2 µg/ml bovine insulin  
636 (Cell Applications, San Diego, CA, USA), was added to the sample prior to mounting on a  
637 lumox® dish 50 (94.6077.410; Sarstedt, Newton, NC, USA). Time-lapse videos were generally  
638 acquired at intervals of 2–3 min for 3–6 h using a 20× Plan-Apochromat 0.75 NA objective, a  
639 Zeiss Colibri LED light source, and a Zeiss Axiocam 503 mono camera. The LED light intensity  
640 was experimentally adjusted to maximize fluorescence signal and to minimize phototoxicity of  
641 the live sample. Live time-lapse Sqh-GFP imaging was performed on a Zeiss LSM 880 confocal,  
642 as described<sup>44</sup>, with a 40× 1.2 NA water-immersion objective using an interval of 1 min for up to  
643 10 min total time and a laser setting of 5%. In some cases, multiple z-stacks were acquired and  
644 merged in Zeiss AxioVision, Zeiss ZEN 2, or FIJI<sup>90</sup> to produce a single, in-focus time-lapse  
645 video.

646 FRET images (Rac FRET, Rho FRET) of live cultured egg chambers were acquired with  
647 a Zeiss LSM710 microscope essentially as described<sup>22</sup>. A 40× 1.3 NA oil inverted objective was  
648 used to capture single high-resolution stationary images. A 458 nm laser was used to excite the  
649 sample. CFP and YFP emission signals were collected through channel I (470–510 nm) and  
650 channel II (525–600 nm), respectively. The CFP and YFP channels were acquired  
651 simultaneously for most experiments. Sequential acquisition of CFP and YFP channels was  
652 tested but produced the same result as simultaneous acquisition.

653

654 **Image processing and data analysis**

655 Image measurements and editing were performed using Zeiss ZEN 2 or FIJI<sup>90</sup>. Analyses of live  
656 border cell migration time-lapse videos was performed using Zeiss ZEN 2 software. The  
657 migration speed was calculated from the duration of border cell movement. Protrusion  
658 quantification was performed as described<sup>91</sup>. Briefly, a circle was drawn around the cell cluster,  
659 and extensions greater than 1.5  $\mu\text{m}$  outside the circle were defined as protrusions (Supplemental  
660 Figure 6A). Protrusions were classified as directed to the front ( $0^\circ$ - $45^\circ$  and  $0^\circ$ - $315^\circ$ ), side ( $45^\circ$ -  
661  $135^\circ$  and  $225^\circ$ - $315^\circ$ ), or back ( $135^\circ$ - $225^\circ$ ), based on their positions within the cluster. The first 1  
662 h of each video was used for protrusion quantification.

663 To determine the number of cells per cluster, egg chambers were stained for the nuclear  
664 envelope marker Lamin, the DNA stain DAPI, and the cell membrane marker E-Cadherin. Only  
665 clusters that had delaminated, moved forward, and had any detectable E-Cadherin were imaged.  
666 This allowed confidence that the scored cells were border cells. Acquisition of *z*-stacks that  
667 encompassed the entire cluster (border cells and polar cells) were defined by nuclear Lamin  
668 signal. This was followed by manual counting of the nuclei from the resulting images.

669 The circularity of border cells was measured in FIJI. Individual border cells were outlined  
670 manually based on the PLC $\delta$ -PH-GFP signal using the “Freehand Selections” tool. Within the  
671 “Set Measurements” analysis tool, “shape descriptors” was selected, followed by the “Measure”  
672 function, which provided a measurement of circularity. A value of 1.0 indicates a perfect circle,  
673 whereas 0.0 represents an extremely elongated shape.

674 Measurements of E-Cadherin and  $\beta$ -Catenin intensity at cell–cell junctions were  
675 performed on egg chambers that were stained using identical conditions. Samples were imaged  
676 with a 40 $\times$  1.3 NA oil objective. Identical confocal laser settings were used for each channel and  
677 a full *z*-stack of the cluster was produced. Images were then subjected to 3D reconstruction

678 through the “3D Project” function in FIJI. Border cell-border cell (BC-BC) contacts and nurse  
679 cell-nurse cell (NC-NC) contacts were manually identified, a line (width set as 6) drawn, and  
680 mean fluorescence intensity across the line was obtained using the “measure” tool. A ratio of  
681 BC-BC intensity versus NC-NC intensity was calculated to normalize protein levels.

682 To measure colocalization between Mbs and Flw, or Mbs and Pp1 $\alpha$ -96A, the “RGB  
683 Profiler” FIJI plugin was used. After converting the image to RGB, a line was drawn across the  
684 whole border cell cluster to generate the image intensity plot. The localization patterns of F-actin  
685 and Mbs with Pp1 $\alpha$ -96A-GFP and Flw-YFP were measured through the “Analyze>Plot Profile”  
686 function in FIJI. A line was drawn across the border cells and polar cells and the pixel intensity  
687 value was obtained across the line. The values for each channel were normalized to the highest  
688 pixel value, and a scatter plot showing F-actin and DAPI was generated in Microsoft Excel.

689 For Rho-FRET and Rac-FRET, the CFP and YFP images were first processed in ImageJ.  
690 A background region of interest was subtracted from the original image. The YFP images were  
691 registered to CFP images using the TurboReg plugin. The Gaussian smooth filter was then  
692 applied to both channels. The YFP image was thresholded and converted to a binary mask with  
693 the background set to zero. The final ratio image was generated in MATLAB, during which only  
694 the unmasked pixels were calculated as described<sup>22</sup>.

695

## 696 **Figures, graphs, and statistics**

697 Figures were assembled in Adobe Photoshop CC. Illustrations were created in Affinity Designer  
698 (Serif, Nottingham, United Kingdom). Videos were assembled in Zeiss AxioVision 4.8, Zeiss  
699 ZEN 2, or FIJI. Graphs and statistical tests were performed using GraphPad Prism 7 (GraphPad  
700 Software, San Diego, CA, USA). The statistical tests and *p* values are listed in the figure legends.

701

702 **Acknowledgements**

703 We thank Drs. Chris Doe, Denise Montell, Pernille Rørth, Change Tan, Tina Tootle, Alan Zhu,  
704 the Bloomington *Drosophila* Stock Center, the Developmental Studies Hybridoma Center  
705 (University of Iowa), FlyORF, the Kyoto Stock Center, and Vienna Drosophila Resource Center  
706 (VDRC) for fly stocks, antibodies, and protocols. We also thank Dr. Pralay Majumder for  
707 discussions and providing comments on the manuscript. The Confocal Core, funded by the  
708 Kansas State University College of Veterinary Medicine, provided use of the Zeiss LSM 880  
709 confocal microscope. This work was supported in part by a fellowship from the Kansas INBRE  
710 through the National Institutes of Health (P20 GM103418) to Y.C., and by grants from the  
711 Scientifiques de la Fondation ARC (grant number PJA 20171206526) to X.W. and the National  
712 Science Foundation (1456053 and 1738757) to J.A.M.

713



## 714 References

- 715 1. Friedl, P., Locker, J., Sahai, E. & Segall, J. E. Classifying collective cancer cell invasion.  
716 *Nat. Cell Biol.* **14**, 777–783 (2012).
- 717 2. Friedl, P. & Gilmour, D. Collective cell migration in morphogenesis, regeneration and  
718 cancer. *Nat. Rev. Mol. Cell Biol.* **10**, 445–457 (2009).
- 719 3. Wang, X., Enomoto, A., Asai, N., Kato, T. & Takahashi, M. Collective invasion of cancer:  
720 Perspectives from pathology and development. *Pathol. Int.* **66**, 183–192 (2016).
- 721 4. Cheung, K. J. & Ewald, A. J. A collective route to metastasis: Seeding by tumor cell  
722 clusters. *Science* **352**, 167–169 (2016).
- 723 5. Scarpa, E. & Mayor, R. Collective cell migration in development. *J. Cell Biol.* **212**, 143–  
724 155 (2016).
- 725 6. Huebner, R. J., Neumann, N. M. & Ewald, A. J. Mammary epithelial tubes elongate  
726 through MAPK-dependent coordination of cell migration. *Development* **143**, 983–993  
727 (2016).
- 728 7. Shellard, A. & Mayor, R. Supracellular migration - beyond collective cell migration. *J. Cell*  
729 *Sci.* **132**, jcs226142 (2019).
- 730 8. Mayor, R. & Etienne-Manneville, S. The front and rear of collective cell migration. *Nat.*  
731 *Rev. Mol. Cell Biol.* **17**, 97–109 (2016).
- 732 9. Friedl, P. & Mayor, R. Tuning Collective Cell Migration by Cell-Cell Junction Regulation.  
733 *Cold Spring Harb. Perspect. Biol.* **9**, a029199 (2017).
- 734 10. Shellard, A., Szabó, A., Trepát, X. & Mayor, R. Supracellular contraction at the rear of  
735 neural crest cell groups drives collective chemotaxis. *Science* **362**, 339–343 (2018).
- 736 11. Hidalgo-Carcedo, C., Hooper, S., Chaudhry, S. I., Williamson, P., Harrington, K.,  
737 Leitinger, B. & Sahai, E. Collective cell migration requires suppression of actomyosin at  
738 cell-cell contacts mediated by DDR1 and the cell polarity regulators Par3 and Par6. *Nat.*  
739 *Cell Biol.* **13**, 49–58 (2011).
- 740 12. Reffay, M., Parrini, M. C., Cochet-Escartin, O., Ladoux, B., Buguin, A., Coscoy, S.,  
741 Amblard, F., Camonis, J. & Silberzan, P. Interplay of RhoA and mechanical forces in  
742 collective cell migration driven by leader cells. *Nat. Cell Biol.* **16**, 217–223 (2014).
- 743 13. Montell, D. J., Yoon, W. H. & Starz-Gaiano, M. Group choreography: mechanisms  
744 orchestrating the collective movement of border cells. *Nat. Rev. Mol. Cell Biol.* **13**, 631–  
745 645 (2012).
- 746 14. Saadin, A. & Starz-Gaiano, M. Circuitous Genetic Regulation Governs a Straightforward  
747 Cell Migration. *Trends Genet.* **32**, 660–673 (2016).
- 748 15. Llense, F. & Martín-Blanco, E. JNK signaling controls border cell cluster integrity and  
749 collective cell migration. *Curr. Biol.* **18**, 538–544 (2008).
- 750 16. Cai, D., Chen, S.-C., Prasad, M., He, L., Wang, X., Choesmel-Cadamuro, V., Sawyer, J.  
751 K., Danuser, G. & Montell, D. J. Mechanical Feedback through E-Cadherin Promotes  
752 Direction Sensing during Collective Cell Migration. *Cell* **157**, 1146–1159 (2014).
- 753 17. Prasad, M. & Montell, D. J. Cellular and Molecular Mechanisms of Border Cell Migration  
754 Analyzed Using Time-Lapse Live-Cell Imaging. *Dev. Cell* **12**, 997–1005 (2007).
- 755 18. Bianco, A., Poukkula, M., Cliffe, A., Mathieu, J., Luque, C. M., Fulga, T. A. & Rørth, P.  
756 Two distinct modes of guidance signalling during collective migration of border cells.  
757 *Nature* **448**, 362–365 (2007).
- 758 19. Poukkula, M., Cliffe, A., Changede, R. & Rørth, P. Cell behaviors regulated by guidance  
759 cues in collective migration of border cells. *J. Cell Biol.* **192**, 513–524 (2011).
- 760 20. Duchek, P., Somogyi, K., Jékely, G., Beccari, S. & Rørth, P. Guidance of cell migration by  
761 the *Drosophila* PDGF/VEGF receptor. *Cell* **107**, 17–26 (2001).
- 762 21. McDonald, J. A., Pinheiro, E. M., Kadlec, L., Schupbach, T. & Montell, D. J. Multiple  
763 EGFR ligands participate in guiding migrating border cells. *Dev. Biol.* **296**, 94–103 (2006).

- 764 22. Wang, X., He, L., Wu, Y. I., Hahn, K. M. & Montell, D. J. Light-mediated activation reveals  
765 a key role for Rac in collective guidance of cell movement in vivo. *Nat. Cell Biol.* **12**, 591–  
766 597 (2010).
- 767 23. Ramel, D., Wang, X., Laflamme, C., Montell, D. J. & Emery, G. Rab11 regulates cell-cell  
768 communication during collective cell movements. *Nat. Cell Biol.* **15**, 317–324 (2013).
- 769 24. Aranjuez, G., Burtscher, A., Sawant, K., Majumder, P. & McDonald, J. A. Dynamic  
770 myosin activation promotes collective morphology and migration by locally balancing  
771 oppositional forces from surrounding tissue. *Mol. Biol. Cell* **27**, 1898–1910 (2016).
- 772 25. Lucas, E. P., Khanal, I., Gaspar, P., Fletcher, G. C., Polesello, C., Tapon, N. &  
773 Thompson, B. J. The Hippo pathway polarizes the actin cytoskeleton during collective  
774 migration of *Drosophila* border cells. *J. Cell Biol.* **201**, 875–885 (2013).
- 775 26. Combedazou, A., Choesmel-Cadamuro, V., Gay, G., Liu, J., Dupré, L., Ramel, D. &  
776 Wang, X. Myosin II governs collective cell migration behaviour downstream of guidance  
777 receptor signalling. *J. Cell Sci.* **130**, 97–103 (2017).
- 778 27. Larsen, M., Tremblay, M. L. & Yamada, K. M. Phosphatases in cell–matrix adhesion and  
779 migration. *Nat. Rev. Mol. Cell Biol.* **4**, 700–711 (2003).
- 780 28. Majumder, P., Aranjuez, G., Amick, J. & McDonald, J. A. Par-1 controls myosin-II activity  
781 through myosin phosphatase to regulate border cell migration. *Curr. Biol.* **22**, 363–372  
782 (2012).
- 783 29. Felix, M., Chayengia, M., Ghosh, R., Sharma, A., & Prasad, M. Pak3 regulates apical-  
784 basal polarity in migrating border cells during *Drosophila* oogenesis. *Development* **142**,  
785 3692–3703 (2015).
- 786 30. Lin, Q., Buckler, E. S., Muse, S. V. & Walker, J. C. Molecular evolution of type 1  
787 serine/threonine protein phosphatases. *Mol. Phylogenet. Evol.* **12**, 57–66 (1999).
- 788 31. Verbinnen, I., Ferreira, M. & Bollen, M. Biogenesis and activity regulation of protein  
789 phosphatase 1. *Biochem. Soc. Trans.* **45**, 89–99 (2017).
- 790 32. Heroes, E., Lesage, B., Gömemann, J., Beullens, M., Van Meervelt, L. & Bollen, M. The  
791 PP1 binding code: a molecular-lego strategy that governs specificity. *FEBS J.* **280**, 584–  
792 595 (2013).
- 793 33. Ceulemans, H. & Bollen, M. Functional diversity of protein phosphatase-1, a cellular  
794 economizer and reset button. *Physiol. Rev.* **84**, 1–39 (2004).
- 795 34. Ferreira, M., Beullens, M., Bollen, M. & Van Eynde, A. Functions and therapeutic  
796 potential of protein phosphatase 1: Insights from mouse genetics. *Biochim. Biophys. Acta*  
797 *Mol. Cell Res.* **1866**, 16–30 (2019).
- 798 35. Miskei, M., Ádám, C., Kovács, L., Karányi, Z. & Dombrádi, V. Molecular Evolution of  
799 Phosphoprotein Phosphatases in *Drosophila*. *PLoS ONE* **6**, e22218 (2011).
- 800 36. Bennett, D., Szöör, B., Gross, S., Vereshchagina, N. & Alpey, L. Ectopic expression of  
801 inhibitors of protein phosphatase type 1 (PP1) can be used to analyze roles of PP1 in  
802 *Drosophila* development. *Genetics* **164**, 235–245 (2003).
- 803 37. Winkler, C., De Munter, S., Van Dessel, N., Lesage, B., Heroes, E., Boens, S., Beullens,  
804 M., Van Eynde, A. & Bollen, M. The selective inhibition of protein phosphatase-1 results  
805 in mitotic catastrophe and impaired tumor growth. *J. Cell Sci.* **128**, 4526–4537 (2015).
- 806 38. Parker, L., Gross, S., Beullens, M., Bollen, M., Bennett, D. & Alpey, L. Functional  
807 interaction between nuclear inhibitor of protein phosphatase type 1 (NIPP1) and protein  
808 phosphatase type 1 (PP1) in *Drosophila*: consequences of over-expression of NIPP1 in  
809 flies and suppression by co-expression of PP1. *Biochem. J.* **368**, 789–797 (2002).
- 810 39. Van Eynde, A., Wera, S., Beullens, M., Torrekens, S., Van Leuven, F., Stalmans, W. &  
811 Bollen, M. Molecular Cloning of NIPP-1, a Nuclear Inhibitor of Protein Phosphatase-1,  
812 Reveals Homology with Polypeptides Involved in RNA Processing. *J. Biol. Chem.* **270**,  
813 28068–28074 (1995).

- 814 40. Silver, D. L. & Montell, D. J. Paracrine Signaling through the JAK/STAT Pathway  
815 Activates Invasive Behavior of Ovarian Epithelial Cells in *Drosophila*. *Cell* **107**, 831–841  
816 (2001).
- 817 41. Niewiadowska, P., Godt, D. & Tepass, U. DE-Cadherin is required for intercellular motility  
818 during *Drosophila* oogenesis. *J. Cell Biol.* **144**, 533–547 (1999).
- 819 42. Montell, D. J., Rørth, P. & Spradling, A. C. slow border cells, a locus required for a  
820 developmentally regulated cell migration during oogenesis, encodes *Drosophila* CEBP.  
821 *Cell* **71**, 51–62 (1992).
- 822 43. Starz-Gaiano, M., Melani, M., Wang, X., Meinhardt, H. & Montell, D. J. Feedback  
823 inhibition of Jak/STAT signaling by apontic is required to limit an invasive cell population.  
824 *Dev. Cell* **14**, 726–738 (2008).
- 825 44. Dai, W. & Montell, D. J. Live Imaging of Border Cell Migration in *Drosophila*. *Methods*  
826 *Mol. Biol.* **1407**, 153–168 (2016).
- 827 45. Dombrádi, V., Mann, D. J., Saunders, R. D. C. & Cohen, P. T. W. Cloning of the fourth  
828 functional gene for Protein Phosphatase 1 in *Drosophila melanogaster* from its  
829 chromosomal location. *Eur. J. Biochem.* **212**, 177–183 (1993).
- 830 46. Dombrádi, V., Axton, J. M., Brewis, N. D., Silva, E. F. D. C. E., Alphey, L. & Cohen, P. T.  
831 W. *Drosophila* contains three genes that encode distinct isoforms of protein phosphatase  
832 1. *Eur. J. Biochem.* **194**, 739–745 (1990).
- 833 47. Graveley, B. R., Brooks, A. N., Carlson, J. W., Duff, M. O., Landolin, J. M., Yang, L.,  
834 Artieri, C. G., van Baren, M. J., Boley, N., Booth, B. W., Brown, J. B., Cherbas, L., Davis,  
835 C. A., Dobin, A., Li, R., Lin, W., Malone, J. H., Mattiuzzo, N. R., Miller, D., Sturgill, D.,  
836 Tuch, B. B., Zaleski, C., Zhang, D., Blanchette, M., Dudoit, S., Eads, B., Green, R. E.,  
837 Hammonds, A., Jiang, L., Kapranov, P., Langton, L., Perrimon, N., Sandler, J. E., Wan,  
838 K. H., Willingham, A., Zhang, Y., Zou, Y., Andrews, J., Bickel, P. J., Brenner, S. E., Brent,  
839 M. R., Cherbas, P., Gingeras, T. R., Hoskins, R. A., Kaufman, T. C., Oliver, B. & Celniker,  
840 S. E. The developmental transcriptome of *Drosophila melanogaster*. *Nature* **471**, 473–  
841 479 (2011).
- 842 48. Sarov, M., Barz, C., Jambor, H., Hein, M. Y., Schmied, C., Suchold, D., Stender, B.,  
843 Janosch, S., Kj, V. V., Krishnan, R. T., Krishnamoorthy, A., Ferreira, I. R., Ejsmont, R. K.,  
844 Finkl, K., Hasse, S., Kämpfer, P., Plewka, N., Vinis, E., Schloissnig, S., Knust, E.,  
845 Hartenstein, V., Mann, M., Ramaswami, M., VijayRaghavan, K., Tomancak, P. &  
846 Schnorrer, F. A genome-wide resource for the analysis of protein localisation in  
847 *Drosophila*. *Elife* **5**, e12068 (2016).
- 848 49. Yamamoto, S., Bayat, V., Bellen, H. J. & Tan, C. Protein Phosphatase 1 $\beta$  Limits Ring  
849 Canal Constriction during *Drosophila* Germline Cyst Formation. *PLoS ONE* **8**, e70502  
850 (2013).
- 851 50. Hu, Y., Flockhart, I., Vinayagam, A., Bergwitz, C., Berger, B., Perrimon, N. & Mohr, S. E.  
852 An integrative approach to ortholog prediction for disease-focused and other functional  
853 studies. *BMC Bioinformatics* **12**, 357–1100 (2011).
- 854 51. Trinkle-Mulcahy, L., Sleeman, J. E. & Lamond, A. I. Dynamic targeting of protein  
855 phosphatase 1 within the nuclei of living mammalian cells. *J. Cell Sci.* **114**, 4219–4228  
856 (2001).
- 857 52. Mohr, S. E., Smith, J. A., Shamu, C. E., Neumüller, R. A. & Perrimon, N. RNAi screening  
858 comes of age: improved techniques and complementary approaches. *Nat. Rev. Mol. Cell*  
859 *Biol.* **15**, 591–600 (2014).
- 860 53. Sun, Y., Yan, Y., Deneff, N. & Schupbach, T. Regulation of somatic myosin activity by  
861 protein phosphatase 1 $\beta$  controls *Drosophila* oocyte polarization. *Development* **138**,  
862 1991–2001 (2011).
- 863 54. Collins, C. & Nelson, W. J. Running with neighbors: coordinating cell migration and cell-  
864 cell adhesion. *Curr. Opin. Cell Biol.* **36**, 62–70 (2015).

- 865 55. Sarpal, R., Pellikka, M., Patel, R. R., Hui, F. Y. W., Godt, D. & Tepass, U. Mutational  
866 analysis supports a core role for Drosophila  $\alpha$ -catenin in adherens junction function. *J.*  
867 *Cell Sci.* **125**, 233–245 (2012).
- 868 56. Desai, R., Sarpal, R., Ishiyama, N., Pellikka, M., Ikura, M. & Tepass, U. Monomeric  $\alpha$ -  
869 catenin links cadherin to the actin cytoskeleton. *Nat. Cell Biol.* **15**, 261–273 (2013).
- 870 57. Pacquelet, A. & Rørth, P. Regulatory mechanisms required for DE-cadherin function in  
871 cell migration and other types of adhesion. *J. Cell Biol.* **170**, 803–812 (2005).
- 872 58. Ridley, A. J. Life at the leading edge. *Cell* **145**, 1012–1022 (2011).
- 873 59. Caswell, P. T. & Zech, T. Actin-Based Cell Protrusion in a 3D Matrix. *Trends Cell Biol.* **28**,  
874 823–834 (2018).
- 875 60. Boekhorst, Te, V., Preziosi, L. & Friedl, P. Plasticity of Cell Migration In Vivo and In Silico.  
876 *Annu. Rev. Cell Dev. Biol.* **32**, 491–526 (2016).
- 877 61. Wang, H., Qiu, Z., Xu, Z., Chen, S. J., Luo, J., Wang, X. & Chen, J. aPKC is a key  
878 polarity determinant in coordinating the function of three distinct cell polarities during  
879 collective migration. *Development* **145**, dev158444 (2018).
- 880 62. Vicente-Manzanares, M., Ma, X., Adelstein, R. S. & Horwitz, A. R. Non-muscle myosin II  
881 takes centre stage in cell adhesion and migration. *Nat. Rev. Mol. Cell Biol.* **10**, 778–790  
882 (2009).
- 883 63. Grassie, M. E., Moffat, L. D., Walsh, M. P. & MacDonald, J. A. The myosin phosphatase  
884 targeting protein (MYPT) family: a regulated mechanism for achieving substrate  
885 specificity of the catalytic subunit of protein phosphatase type 1 $\delta$ . *Arch. Biochem.*  
886 *Biophys.* **510**, 147–159 (2011).
- 887 64. Qin, X., Park, B. O., Liu, J., Chen, B., Choesmel-Cadamuro, V., Belguise, K., Do Heo, W.  
888 & Wang, X. Cell-matrix adhesion and cell-cell adhesion differentially control basal myosin  
889 oscillation and Drosophila egg chamber elongation. *Nat. Comm.* **8**, 14708 (2017).
- 890 65. Fulga, T. A. & Rørth, P. Invasive cell migration is initiated by guided growth of long  
891 cellular extensions. *Nat. Cell Biol.* **4**, 715–719 (2002).
- 892 66. Kimura, K., Ito, M., Amano, M., Chihara, K., Fukata, Y., Nakafuku, M., Yamamori, B.,  
893 Feng, J., Nakano, T., Okawa, K., Iwamatsu, A. & Kaibuchi, K. Regulation of myosin  
894 phosphatase by Rho and Rho-associated kinase (Rho-kinase). *Science* **273**, 245–248  
895 (1996).
- 896 67. Amano, M., Ito, M., Kimura, K., Fukata, Y., Chihara, K., Nakano, T., Matsuura, Y. &  
897 Kaibuchi, K. Phosphorylation and activation of myosin by Rho-associated kinase (Rho-  
898 kinase). *J. Biol. Chem.* **271**, 20246–20249 (1996).
- 899 68. Matsui, T., Amano, M., Yamamoto, T., Chihara, K., Nakafuku, M., Ito, M., Nakano, T.,  
900 Okawa, K., Iwamatsu, A. & Kaibuchi, K. Rho-associated kinase, a novel serine/threonine  
901 kinase, as a putative target for small GTP binding protein Rho. *EMBO J.* **15**, 2208–2216  
902 (1996).
- 903 69. Julian, L. & Olson, M. F. Rho-associated coiled-coil containing kinases (ROCK). *Small*  
904 *GTPases* **5**, e29846 (2014).
- 905 70. Bravo-Cordero, J. J., Magalhaes, M. A. O., Eddy, R. J., Hodgson, L. & Condeelis, J.  
906 Functions of cofilin in cell locomotion and invasion. *Nat. Rev. Mol. Cell Biol.* **14**, (2013).
- 907 71. Zhang, L., Luo, J., Wan, P., Wu, J., Laski, F. & Chen, J. Regulation of cofilin  
908 phosphorylation and asymmetry in collective cell migration during morphogenesis.  
909 *Development* **138**, 455–464 (2011).
- 910 72. Huet, G., Rajakylä, E. K., Viita, T., Skarp, K.-P., Crivaro, M., Dopie, J. & Vartiainen, M. K.  
911 Actin-regulated feedback loop based on Phactr4, PP1 and cofilin maintains the actin  
912 monomer pool. *J. Cell Sci.* **126**, 497–507 (2013).
- 913 73. Ambach, A., Saunus, J., Konstandin, M., Wesselborg, S., Meuer, S. C. & Samstag, Y.  
914 The serine phosphatases PP1 and PP2A associate with and activate the actin-binding  
915 protein cofilin in human T lymphocytes. *Eur. J. Immunol.* **30**, 3422–3431 (2000).

- 916 74. Zhang, Y., Kim, T.-H. & Niswander, L. Phactr4 regulates directional migration of enteric  
917 neural crest through PP1, integrin signaling, and cofilin activity. *Genes Dev.* **26**, 69–81  
918 (2012).
- 919 75. Oleinik, N. V., Krupenko, N. I. & Krupenko, S. A. ALDH1L1 inhibits cell motility via  
920 dephosphorylation of cofilin by PP1 and PP2A. *Oncogene* **29**, 6233–6244 (2010).
- 921 76. Kühn, S. & Geyer, M. Formins as effector proteins of Rho GTPases. *Small GTPases* **5**,  
922 e983876 (2014).
- 923 77. Stappert, J. & Kemler, R. A short core region of E-cadherin is essential for catenin  
924 binding and is highly phosphorylated. *Cell Adhes. Commun.* **2**, 319–327 (1994).
- 925 78. McEwen, A. E., Maher, M. T., Mo, R. & Gottardi, C. J. E-cadherin phosphorylation occurs  
926 during its biosynthesis to promote its cell surface stability and adhesion. *Mol. Biol. Cell*  
927 **25**, 2365–2374 (2014).
- 928 79. Chen, Y.-J., Huang, J., Huang, L., Austin, E. & Hong, Y. Phosphorylation potential of  
929 Drosophila E-Cadherin intracellular domain is essential for development and adherens  
930 junction biosynthetic dynamics regulation. *Development* **144**, 1242–1248 (2017).
- 931 80. Escobar, D. J., Desai, R., Ishiyama, N., Folmsbee, S. S., Novak, M. N., Flozak, A. S.,  
932 Daugherty, R. L., Mo, R., Nanavati, D., Sarpal, R., Leckband, D., Ikura, M., Tepass, U. &  
933 Gottardi, C. J.  $\alpha$ -Catenin phosphorylation promotes intercellular adhesion through a dual-  
934 kinase mechanism. *J. Cell Sci.* **128**, 1150–1165 (2015).
- 935 81. Yap, A. S., Duszyc, K. & Viasnoff, V. Mechanosensing and Mechanotransduction at Cell-  
936 Cell Junctions. *Cold Spring Harb. Perspect. Biol.* a028761 (2017).
- 937 82. Mège, R.-M. & Ishiyama, N. Integration of Cadherin Adhesion and Cytoskeleton at  
938 Adherens Junctions. *Cold Spring Harb. Perspect. Biol.* **9**, a028738 (2017).
- 939 83. Weiser, D. C., Row, R. H. & Kimelman, D. Rho-regulated Myosin phosphatase  
940 establishes the level of protrusive activity required for cell movements during zebrafish  
941 gastrulation. *Development* **136**, 2375–2384 (2009).
- 942 84. McGuire, S. E., Mao, Z. & Davis, R. L. Spatiotemporal Gene Expression Targeting with  
943 the TARGET and Gene-Switch Systems in Drosophila. *Sci. Signal.* **2004**, pl6 (2004).
- 944 85. Rørth, P., Szabo, K., Bailey, A., Laverty, T., Rehm, J., Rubin, G. M., Weigmann, K.,  
945 Milán, M., Benes, V., Ansorge, W. & Cohen, S. M. Systematic gain-of-function genetics in  
946 Drosophila. *Development* **125**, 1049–1057 (1998).
- 947 86. Xu, T. & Rubin, G. M. Analysis of genetic mosaics in developing and adult Drosophila  
948 tissues. *Development* **117**, 1223–1237 (1993).
- 949 87. Bischof, J., Björklund, M., Furger, E., Schertel, C., Taipale, J. & Basler, K. A versatile  
950 platform for creating a comprehensive UAS-ORFeome library in Drosophila. *Development*  
951 **140**, 2434–2442 (2013).
- 952 88. Tootle, T. L. & Spradling, A. C. Drosophila Pxt: a cyclooxygenase-like facilitator of follicle  
953 maturation. *Development* **135**, 839–847 (2008).
- 954 89. Spracklen, A. J., Kelps, D. J., Chen, X., Spracklen, C. N. & Tootle, T. L. Prostaglandins  
955 temporally regulate cytoplasmic actin bundle formation during Drosophila oogenesis. *Mol.*  
956 *Biol. Cell* **25**, 397–411 (2014).
- 957 90. Schindelin, J., Arganda-Carreras, I., Frise, E., Kaynig, V., Longair, M., Pietzsch, T.,  
958 Preibisch, S., Rueden, C., Saalfeld, S., Schmid, B., Tinevez, J.-Y., White, D. J.,  
959 Hartenstein, V., Eliceiri, K., Tomancak, P. & Cardona, A. Fiji: an open-source platform for  
960 biological-image analysis. *Nat. Methods* **9**, 676–682 (2012).
- 961 91. Sawant, K., Chen, Y., Kotian, N., Preuss, K. M. & McDonald, J. A. Rap1 GTPase  
962 promotes coordinated collective cell migration in vivo. *Mol. Biol. Cell* **29**, 2656–2673  
963 (2018).
- 964 92. Jambor, H., Surendranath, V., Kalinka, A. T., Mejstrik, P., Saalfeld, S. & Tomancak, P.  
965 Systematic imaging reveals features and changing localization of mRNAs in Drosophila  
966 development. *Elife* **4**, R106 (2015).

## 967 Figure Legends

### 968 Figure 1

969 NiPp1 expression causes the border cell cluster to fall apart and disrupts migration. **(A-F)** Wild-  
970 type border cell migration during oogenesis stages 9 and 10. **(A-C)** Egg chambers at the  
971 indicated stages labeled with E-Cadherin (E-Cad; green), F-actin (magenta) and DAPI (blue).  
972 Arrowheads indicate the border cell cluster. **(D-F)** Magnified views of the same border cell  
973 cluster from (A-C), showing FasIII (red) in the polar cells, E-Cad and DAPI. The border cell  
974 cluster is composed of two polar cells (marked by asterisks) in the center and four to eight outer  
975 border cells that are tightly connected with each other as indicated by E-Cad staining. **(G, H)**  
976 Egg chambers labeled with Singed (SN; green) to detect border cells (arrowheads), phalloidin to  
977 detect F-actin (red), and DAPI to detect nuclei (blue). Control border cells (G) reach the oocyte  
978 as a single cluster, whereas NiPp1-expressing border cells (H) dissociate from the cluster into  
979 small groups, with only a few reaching the oocyte. **(I)** Quantification of border cell cluster  
980 migration for matched control and NiPp1 overexpression, shown as the percentage that did not  
981 complete (red), or completed (green) their migration to the oocyte, as indicated in the egg  
982 chamber schematic. **(J)** Quantification of cluster cohesion, shown as the percentage of border  
983 cells found as a single unit (1 part) or split into multiple parts (2-3 parts or >3 parts) in control  
984 versus NiPp1-expressing egg chambers. **(I, J)** Error bars represent SEM in 3 experiments, each  
985 trial assayed  $n \geq 69$  egg chambers (total  $n \geq 221$  egg chambers per genotype). \*\*\* $p < 0.001$ ,  
986 \*\*\*\* $p < 0.0001$ , unpaired two-tailed  $t$  test. **(K-L)** Frames from a control (Video 1; K-K") and an  
987 NiPp1 overexpression (OE; Video 2; L-L") time-lapse video showing movement of the border  
988 cell cluster over the course of 3 h (time in minutes). Border cells (arrowheads) express UAS-  
989 mCherry-Jupiter, which labels cytoplasmic microtubules. **(M)** Measurement of border cell  
990 migration speed from control ( $n=11$  videos) and NiPp1 overexpression ( $n=11$  videos; 22 tracked  
991 border cell 'parts') videos, shown as a box-and-whiskers plot. The whiskers represent the  
992 minimum and maximum pixel intensity; the box extends from the 25th to the 75th percentiles  
993 and the line indicates the median. \*\*\*\* $p < 0.0001$ , unpaired two-tailed  $t$  test. In this and all  
994 subsequent figures, anterior is to the left and the scale bars indicate the image magnification. All  
995 genotypes are listed in Supplemental Table 2.

### 996 Figure 2

997 Pp1c expression in border cells and specificity of Pp1c activity inhibition by NiPp1. **(A-F)** Stage  
998 9 and 10 egg chambers showing the endogenous patterns of Pp1c subunits (green) in border  
999 cells (arrowheads), follicle cells, and the germline nurse cells and oocyte. DAPI (blue) labels  
1000 nuclei. Insets, zoomed-in detail of border cells from the same egg chambers. **(A-C)** Pp1 $\alpha$ -96A  
1001 (green) expression, visualized by a GFP-tagged fly-TransgeneOme (fTRG) line. **(D-F)** Flw  
1002 expression (green), visualized by a YFP-protein trap in the endogenous *flw* genetic locus. **(G, H)**  
1003 Overexpression of *Pp1c* genes rescues the migration (G) and cluster cohesion (H) defects of  
1004 NiPp1-expressing border cells. **(G)** Quantification of the migration distance at stage 10 for  
1005 border cells in NiPp1-expressing egg chambers versus rescue by overexpression of the  
1006 indicated *Pp1c* genes, shown as complete (green) and incomplete (red) border cell migration  
1007 (see Figure 1I for egg chamber schematic). **(H)** Quantification of cluster cohesion at stage 10,  
1008 shown as the percentage of border cells found as a single unit (1 part) or split into multiple parts

1009 (2 parts, 3 parts, >3 parts) in NiPp1-expressing egg chambers versus rescue by overexpression  
1010 of the indicated *Pp1c* genes. (G, H) Error bars represent SEM in 3 experiments, each trial  
1011 assayed  $n \geq 44$  egg chambers (total  $n \geq 148$  per genotype). \* $p < 0.05$ , \*\* $p < 0.01$ ; \*\*\* $p < 0.001$ ;  
1012 \*\*\*\* $p < 0.0001$ , unpaired two-tailed *t* test. All genotypes are listed in Supplemental Table 2.

### 1013 **Figure 3**

1014 Pp1c genes are required for normal border cell migration and cluster cohesion. (A-F)  
1015 Knockdown of *Pp1c* genes by RNAi disrupts border cell cluster migration and cohesion. (A-D)  
1016 Stage 10 egg chambers expressing RNAi against the indicated genes were stained for SN (red)  
1017 to label border cells (arrowheads), phalloidin to label F-actin (green) and DAPI to label nuclei  
1018 (blue). (E) Quantification of border cell cluster migration for matched control and RNAi  
1019 knockdown of the indicated *Pp1c* genes, shown as the percentage that did not complete (red),  
1020 or completed (green) their migration to the oocyte (see Figure 1I for egg chamber schematic).  
1021 (F) Quantification of cluster cohesion, shown as the percentage of border cells found as a single  
1022 unit (1 part) or split into multiple parts (2-3 parts or >3 parts) in control versus *Pp1c* RNAi egg  
1023 chambers. (E, F) Error bars represent SEM in 3 experiments, each trial assayed  $n \geq 59$  (total  $n$   
1024  $\geq 246$  per genotype). (G) Measurement of border cell migration speed in the indicated  
1025 genotypes from individual videos of *Pp1c* RNAi border cells;  $n=14$  videos for control,  $n=11$   
1026 videos for *Pp1-87B-RNAi* (27 split parts were tracked),  $n=12$  videos for *Pp1-13C-RNAi* (17 split  
1027 parts were tracked),  $n=16$  videos for *Pp1alpha-96A-RNAi* (38 split parts were tracked), box-and-  
1028 whiskers plot (see Figure 1 legend for details of plot). (E-G) \* $p < 0.05$ , \*\* $p < 0.01$ , \*\*\* $p < 0.001$ ,  
1029 \*\*\*\* $p < 0.0001$ , unpaired two-tailed *t* test. (H-J) *flw* mutant border cells split from the cluster and  
1030 often fail to migrate. (H-H'') Representative image of a stage 10 egg chamber with *flw*<sup>FP41</sup>  
1031 mutant clones, marked by the loss of nuclear mRFP (dotted outline in H, H') and stained for SN  
1032 (green in H'') to mark border cells (arrowheads) and DAPI (blue in H) to mark nuclei. (I, J)  
1033 Quantification of *flw*<sup>FP41</sup> mutant cluster cohesion (I) and migration (J) at stage 10;  $n=20$  egg  
1034 chambers with *flw*<sup>FP41</sup> clones were examined. (I) Quantification of cluster cohesion at stage 10,  
1035 shown as the percentage of *flw*<sup>FP41</sup> mosaic border cells found as a single unit (1 part) or split into  
1036 multiple parts (2, 3, or 4 parts). (J) Quantification of the migration distance at stage 10 for *flw*<sup>FP41</sup>  
1037 mosaic mutant border cells, shown as complete (green), partial (blue), or incomplete (red)  
1038 border cell migration. All genotypes are listed in Supplemental Table 2.

### 1039 **Figure 4**

1040 The cadherin-catenin complex is required for the collective cohesion of the migrating border cell  
1041 cluster and is regulated by Pp1. (A-J) Knocking down *E-Cad*,  *$\beta$ -Cat* or  *$\alpha$ -Cat* by RNAi disrupts  
1042 border cell cluster migration and cohesion. Images of stage 10 egg chambers stained for  
1043 phalloidin to label F-actin (red) and DAPI to label nuclei (blue). Border cells (arrowheads)  
1044 express the membrane marker PLC $\delta$ -PH-GFP (green). (E-J) Quantification of border cell  
1045 migration (E, G, I) and cluster cohesion (F, H, J) in stage 10 control and *E-Cad-RNAi* (E, F),  *$\beta$ -*  
1046 *Cat-RNAi* (G, H) and  *$\alpha$ -Cat-RNAi* (I, J) egg chambers. The controls for *E-Cad* and  *$\beta$ -Cat-RNAi*  
1047 are identical, but shown on separate graphs (E-H) for clarity; a separate matched control is  
1048 shown for  *$\alpha$ -Cat* RNAi (I, J). Error bars represent SEM in 3 experiments, each trial assayed  $n \geq$   
1049 27 egg chambers (total  $n \geq 93$  for each genotype). \* $p < 0.05$ ; \*\* $p < 0.01$ ; \*\*\* $p < 0.001$ ; \*\*\*\* $p <$   
1050 0.0001, unpaired two-tailed *t* test. (E, G, I) Quantification of border cell migration, shown as the  
1051 percentage of egg chambers with complete (green), partial (blue), or no (red), border cell

1052 migration. **(F, H, J)** Quantification of cluster cohesion, shown as the percentage of border cells  
1053 found as a single unit (1 part) or split into multiple parts (2-3 parts or >3 parts) in control versus  
1054 RNAi egg chambers. **(K-N'')** Representative images showing the E-Cad (white in K, L; green in  
1055 K'', L'') and  $\beta$ -cat (white in M, N; green in M'', N'') protein expression pattern in control and NiPp1  
1056 overexpressing (OE) border cells. Border cells were co-stained for DAPI to mark nuclei (white in  
1057 K', L', M', N'; blue in K'', L'', M'', N''). Images were generated from merged z-sections. The  
1058 enriched levels of E-Cad (K, L) and  $\beta$ -cat (M, N) between border cells (border cell-border cell  
1059 contacts) are marked by yellow and magenta arrows, respectively. The central polar cells are  
1060 indicated by red arrowheads (K', L', M', N'). **(O, P)** Quantification of relative E-Cad (O) and  $\beta$ -  
1061 Cat (P) protein intensity levels in control and NiPp1 overexpressing border cell clusters shown  
1062 as box-and-whiskers plots (see Figure 1 legend for details of plot). For E-Cad, 39 border cell-  
1063 border cell contacts from 8 matched control clusters and 24 border cell-border cell contacts from  
1064 16 NiPp1 clusters were measured. For  $\beta$ -Cat, 33 border cell-border cell contacts from 7  
1065 matched control clusters and 23 border cell-border cell contacts from 15 NiPp1 clusters were  
1066 measured. \*\*\*p < 0.001, \*\*\*\*p < 0.0001, unpaired two-tailed *t* test. All genotypes are listed in  
1067 Supplemental Table 2.

## 1068 **Figure 5**

1069 Pp1c is required for normal border cell protrusion dynamics. **(A-B''')** Frames from a matched  
1070 control (Video 6; A-A''') and a *Pp1alpha-96A-RNAi* (Video 7; B-B''') showing the migrating  
1071 border cell cluster expressing the membrane marker PLC $\beta$ -PH-GFP. Time in min. Arrows  
1072 indicate protrusions, arrowheads indicate cluster "parts". **(C-F)** Quantification of the number of  
1073 protrusions per frame (C), average protrusion lifetime (D), average protrusion length (E), and  
1074 average protrusion area (F) from videos of the indicated genotypes. Protrusions were defined as  
1075 in Supplemental Figure 6A and in the Materials and Methods. For control, protrusions were  
1076 measured in 14 videos (n=51 front-directed protrusions, n=15 side-directed protrusions, n=2  
1077 back-directed protrusions); for *Pp1alpha-96A-RNAi*, protrusions were measured in n=16 videos  
1078 (n=59 front protrusions, n=19 side protrusions, n=9 for back protrusions), for *Pp1-87B-RNAi*,  
1079 protrusions were measured in 13 videos (n=67 for front protrusions, n=10 for side protrusions,  
1080 n=3 for back protrusions); for *Pp1-13C-RNAi*, protrusions were measured in 12 videos (n=61  
1081 front protrusions, n=9 side protrusions, n=1 back protrusion). Data are presented as box-and-  
1082 whiskers plots (see Figure 1 legend for details of plot). \*p < 0.05, \*\*p < 0.01, \*\*\*p < 0.001, \*\*\*\*p  
1083 < 0.0001, unpaired two-tailed *t* test. All genotypes are listed in Supplemental Table 2.

## 1084 **Figure 6**

1085 Pp1 activity promotes normal border cell shape and distribution of actomyosin in the border cell  
1086 cluster. **(A-C)** Pp1 is required for border cell shape. **(A-B')** Examples of control (A, A') and  
1087 NiPp1-expressing border cells (B, B'). Cell shape was visualized using the membrane marker  
1088 PLC $\beta$ -PH-GFP driven by *slbo*-GAL4 (green). Cells were outlined (A, B) and measured for  
1089 circularity (C). **(C)** Control border cells are more elongated compared to NiPp1-expressing  
1090 border cells (closer to 1.0, a perfect circle). Quantification of circularity, showing all data points  
1091 and the mean; 51 control border cells and 57 NiPp1-expressing border cells were measured.  
1092 \*\*\*\*p < 0.0001, unpaired two-tailed *t* test. **(D-G)** Pp1 restricts high levels of F-actin to the border  
1093 cell cluster periphery. Egg chambers were stained for phalloidin to detect F-actin (green in D, E;  
1094 white in D', E') and DAPI to visualize nuclei (white in D, E). **(D, D')** Control wild-type border cells



1095 (*w<sup>1118</sup>*) have higher F-actin at the cluster perimeter (magenta arrows) and low levels at cell-cell  
1096 contacts inside the cluster (yellow arrows). **(E, E')** NiPp1 overexpression increases F-actin  
1097 inside the cluster at cell contacts between border cells and at cell contacts between polar cells  
1098 and border cells (yellow arrows). F-actin is relatively high on the outer surfaces of border cells  
1099 (magenta arrows). **(F, G)** Plot profiles of normalized F-actin (orange) and DAPI (blue)  
1100 fluorescence pixel intensity (AU, arbitrary units) measured along the lines shown in (D) and (E);  
1101 similar results were obtained from additional border cell clusters (n=11 for control and n=8 for  
1102 *sibo>NiPp1*). **(H-I''''')** Pp1 restricts Myo-II, as visualized by Sqh:GFP, to the cluster periphery in  
1103 live border cells. Stills from confocal videos of Sqh:GFP in early-staged border cells over the  
1104 course of 5 minutes. **(H-H''''')** Control border cells (video 13; *w<sup>1118</sup>*). **(I-I''''')** NiPp1  
1105 overexpression (video 14) changes the dynamics of Sqh:GFP, with more Sqh:GFP located at  
1106 cell contacts between border cells. All genotypes are listed in Supplemental Table 2.

### 1107 **Figure 7**

1108 Pp1, through myosin phosphatase, promotes contractility of the cluster. **(A-B')** Pp1 restricts  
1109 Myo-II activation to the cluster periphery. Representative images showing p-Sqh localization  
1110 (green in A, B; white in A', B') in control (A-A') and NiPp1 overexpressing (B-B') border cells;  
1111 DAPI labels nuclei (blue in A, B). **(C-F)** Knocking down *Mbs* disrupts border cell migration and  
1112 cluster cohesion. **(C, D)** Stage 10 control (C) and *Mbs* RNAi (D) egg chambers stained for SN  
1113 label border cells (green), phalloidin to label F-actin (red) and DAPI to label nuclei (blue). **(E)**  
1114 Quantification of border cell cluster migration for matched control and *Mbs-RNAi*, shown as the  
1115 percentage that did not complete (red), or completed (green) their migration to the oocyte (see  
1116 Figure 11 for egg chamber schematic). **(F)** Quantification of cluster cohesion at stage 10, shown  
1117 as the percentage of border cells found as a single unit (1 part) or split into multiple parts (2  
1118 parts, 3 parts, >3 parts) in control versus *Mbs-RNAi* border cells. **(E, F)** Each trial assayed n ≥  
1119 61 egg chambers (total n ≥ 220 per genotype). \*\*p < 0.01; \*\*\*\*p < 0.0001; unpaired two-tailed t  
1120 test. All genotypes are listed in Supplemental Table 2.

1121

### 1122 **Figure 8**

1123 Model for the Pp1 function in border cell migration. **(A)** Schematic of the phenotypes and the  
1124 localizations of F-actin, p-Sqh, and the cadherin-catenin complex during normal and Pp1-  
1125 inhibited (NiPp1 expression or *Pp1c-RNAi*) border cell cluster migration. **(B)** Proposed  
1126 molecular pathways regulated by Pp1, which together promote cohesive collective border cell  
1127 migration.

# Fig 1

bioRxiv preprint doi: <https://doi.org/10.1101/811562>; this version posted October 20, 2019. The copyright holder for this preprint (which was not certified by peer review) is the author/funder, who has granted bioRxiv a license to display the preprint in perpetuity. It is made available under aCC-BY-NC-ND 4.0 International license.

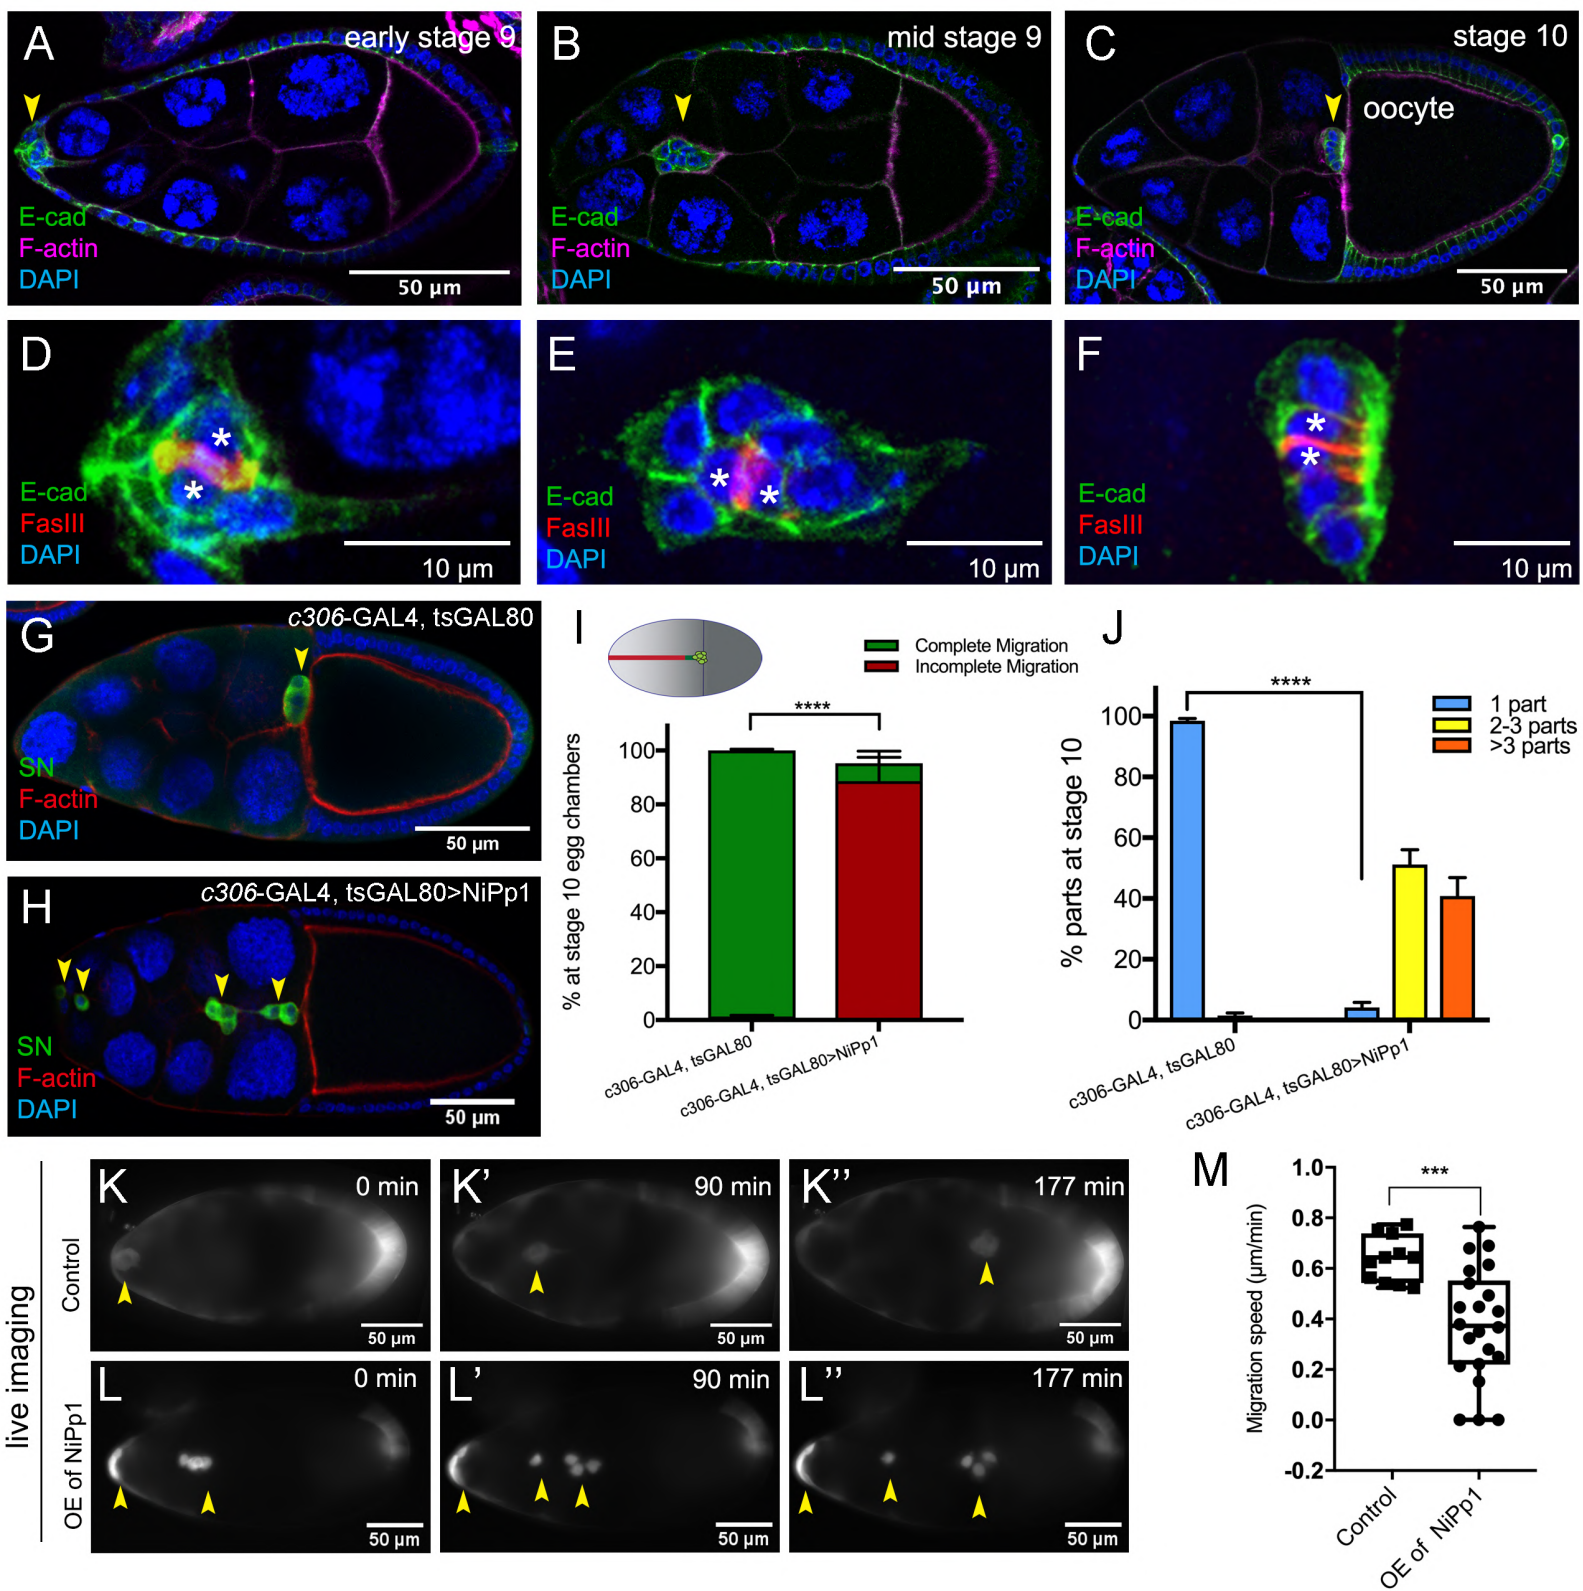

## Fig 2

bioRxiv preprint doi: <https://doi.org/10.1101/811562>; this version posted October 20, 2019. The copyright holder for this preprint (which was not certified by peer review) is the author/funder, who has granted bioRxiv a license to display the preprint in perpetuity. It is made available under aCC-BY-NC-ND 4.0 International license.

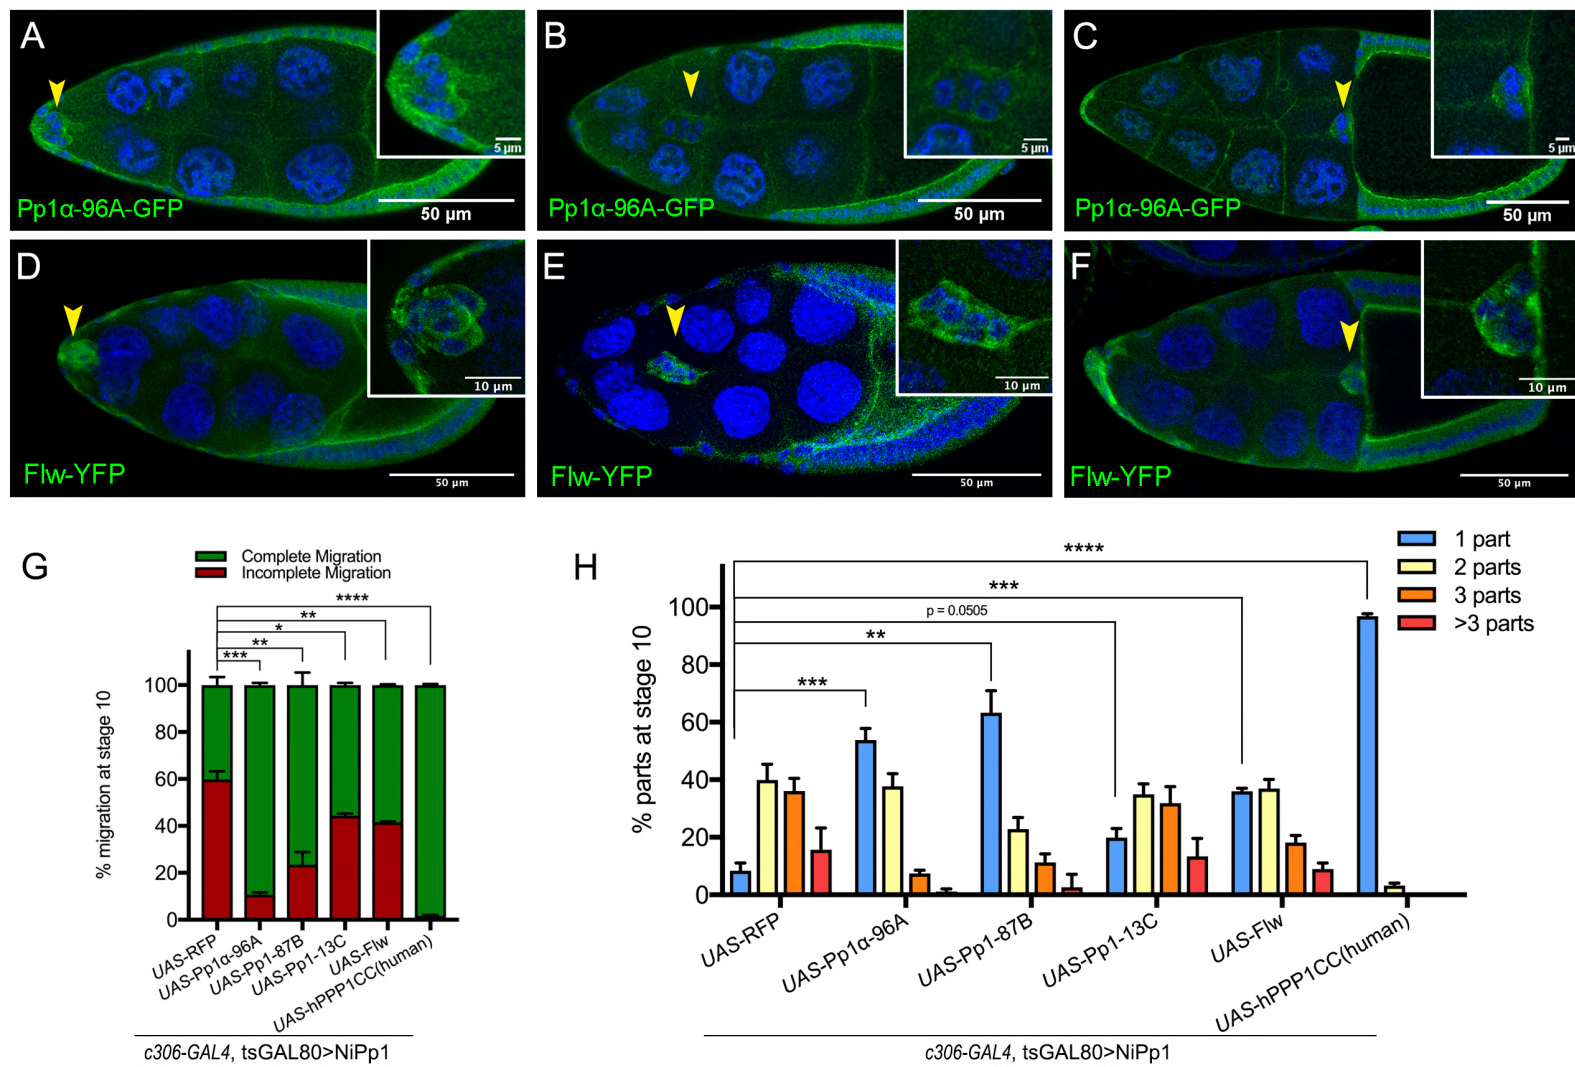

# Fig 3

bioRxiv preprint doi: <https://doi.org/10.1101/811562>; this version posted October 20, 2019. The copyright holder for this preprint (which was not certified by peer review) is the author/funder, who has granted bioRxiv a license to display the preprint in perpetuity. It is made available under aCC-BY-NC-ND 4.0 International license.

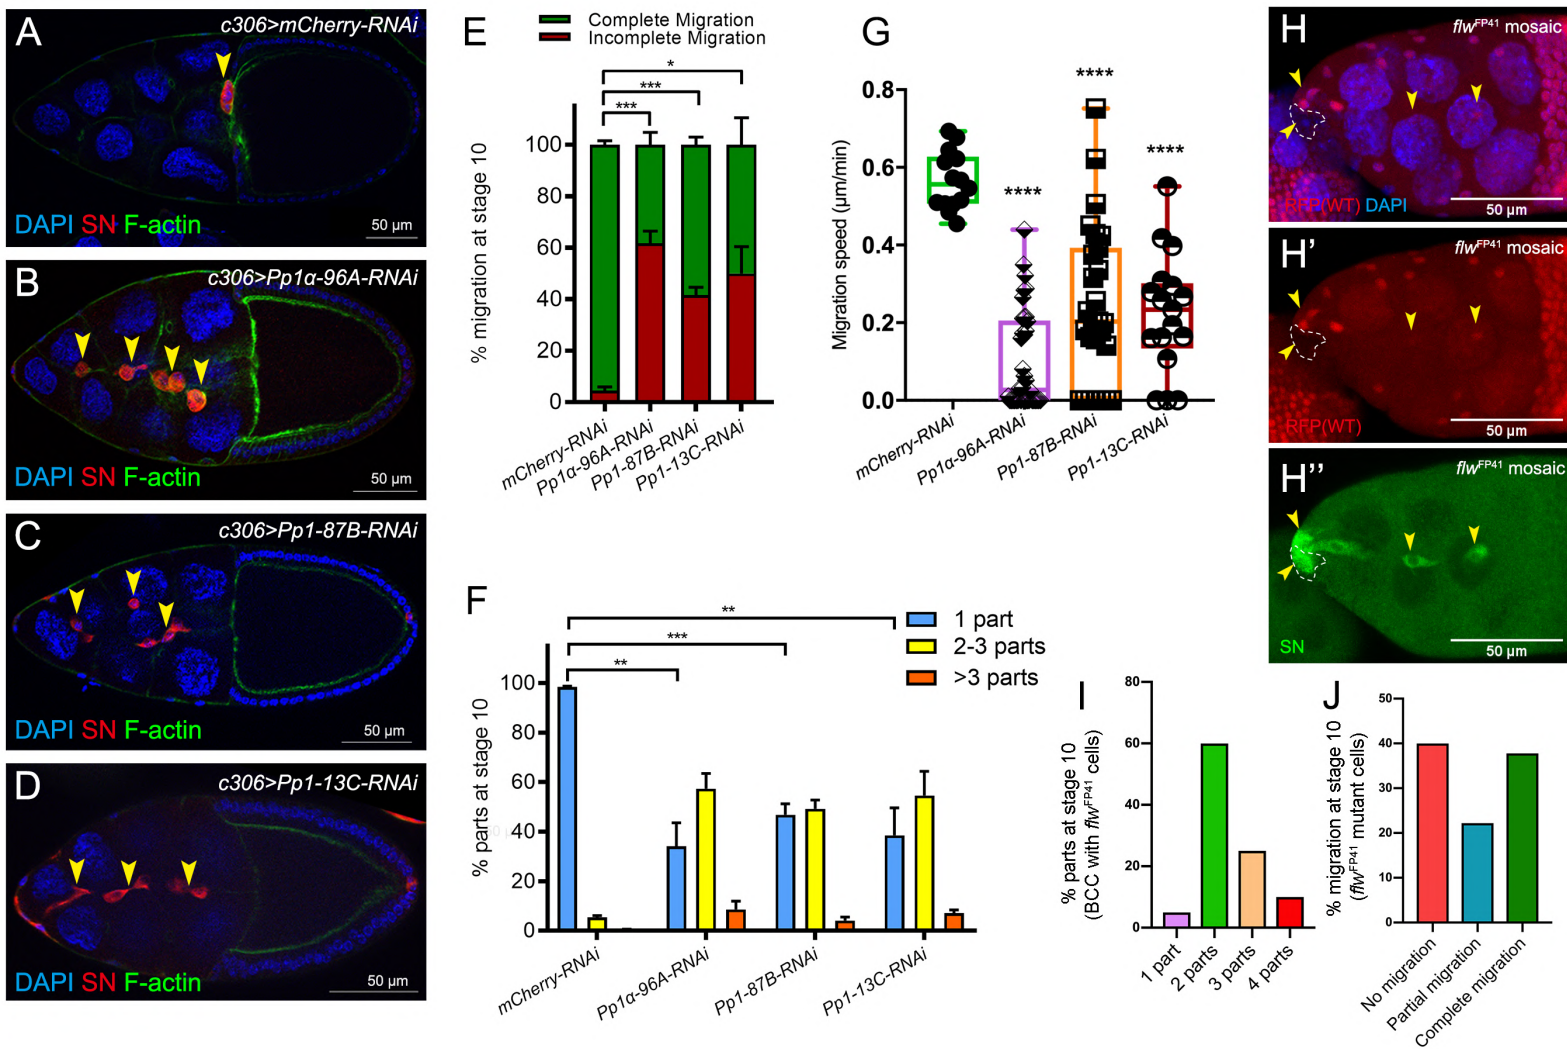

# Fig 4

bioRxiv preprint doi: <https://doi.org/10.1101/811562>; this version posted October 20, 2019. The copyright holder for this preprint (which was not certified by peer review) is the author/funder, who has granted bioRxiv a license to display the preprint in perpetuity. It is made available under aCC-BY-NC-ND 4.0 International license.

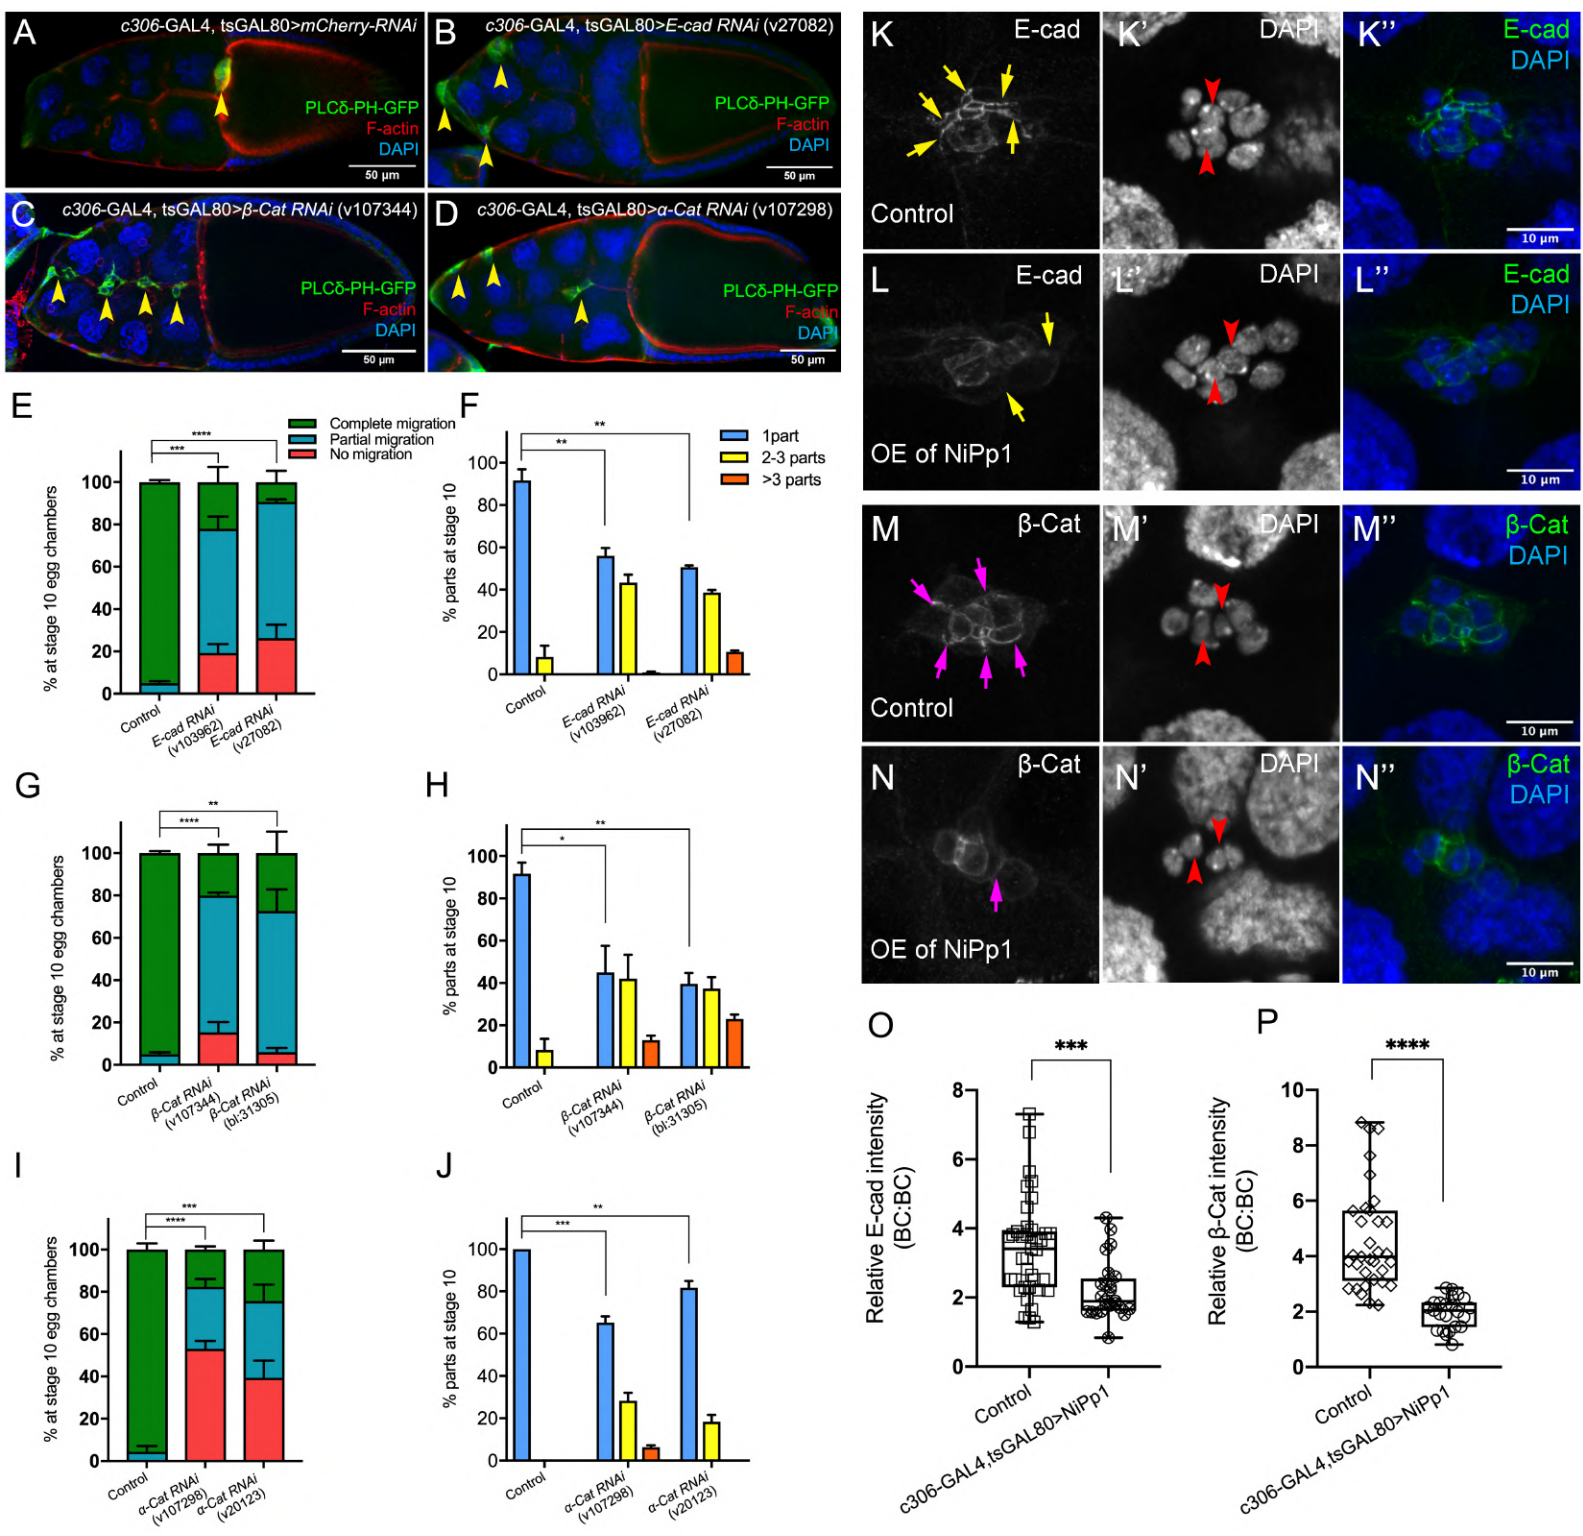

**Fig 5**

bioRxiv preprint doi: <https://doi.org/10.1101/811562>; this version posted October 20, 2019. The copyright holder for this preprint (which was not certified by peer review) is the author/funder, who has granted bioRxiv a license to display the preprint in perpetuity. It is made available under aCC-BY-NC-ND 4.0 International license.

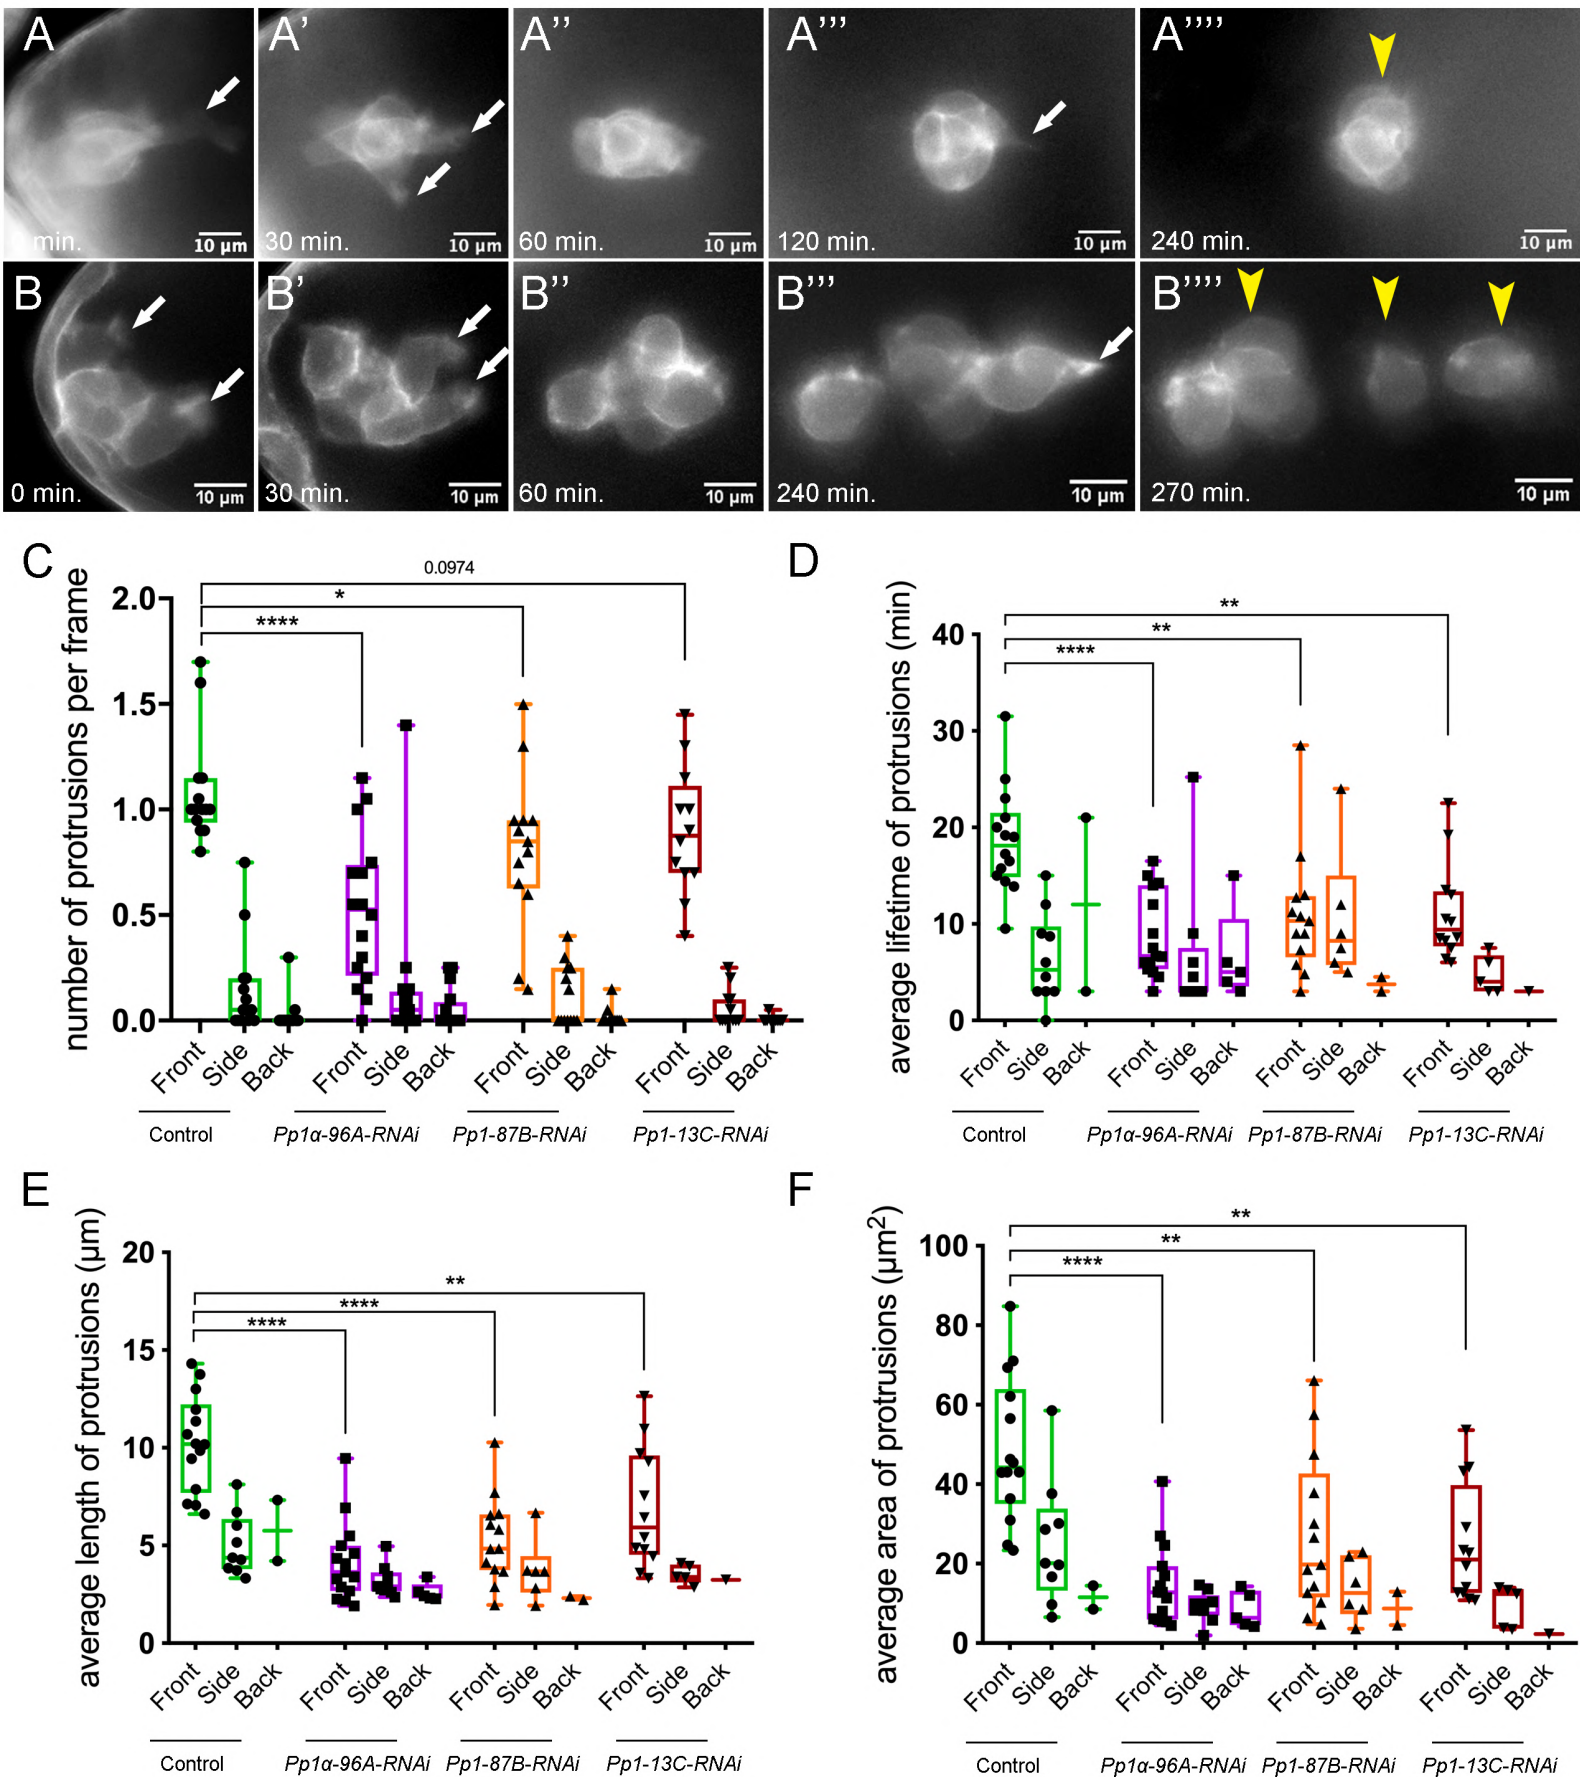

# Fig 6

bioRxiv preprint doi: <https://doi.org/10.1101/811562>; this version posted October 20, 2019. The copyright holder for this preprint (which was not certified by peer review) is the author/funder, who has granted bioRxiv a license to display the preprint in perpetuity. It is made available under aCC-BY-NC-ND 4.0 International license.

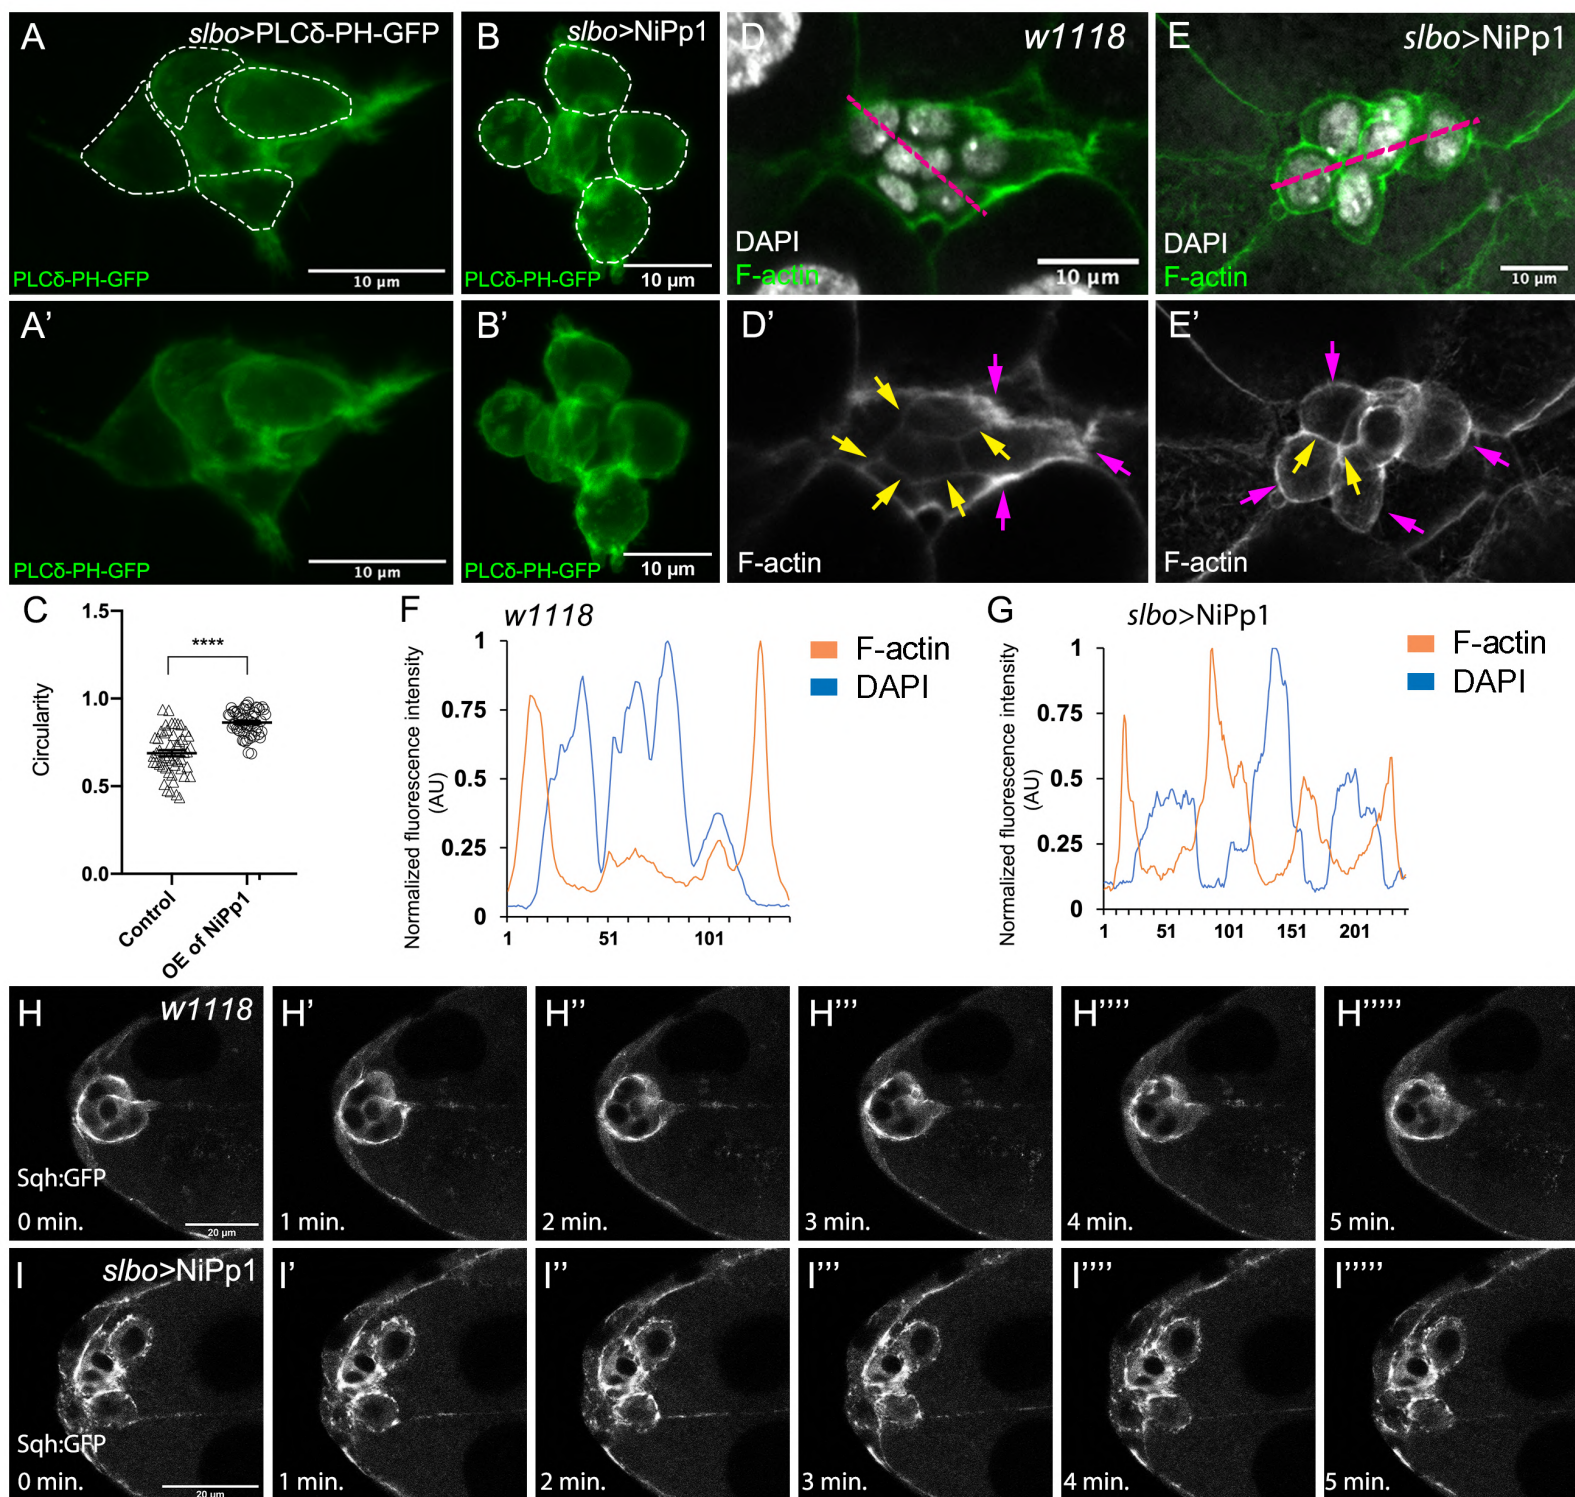

Fig 7

bioRxiv preprint doi: <https://doi.org/10.1101/811562>; this version posted October 20, 2019. The copyright holder for this preprint (which was not certified by peer review) is the author/funder, who has granted bioRxiv a license to display the preprint in perpetuity. It is made available under aCC-BY-NC-ND 4.0 International license.

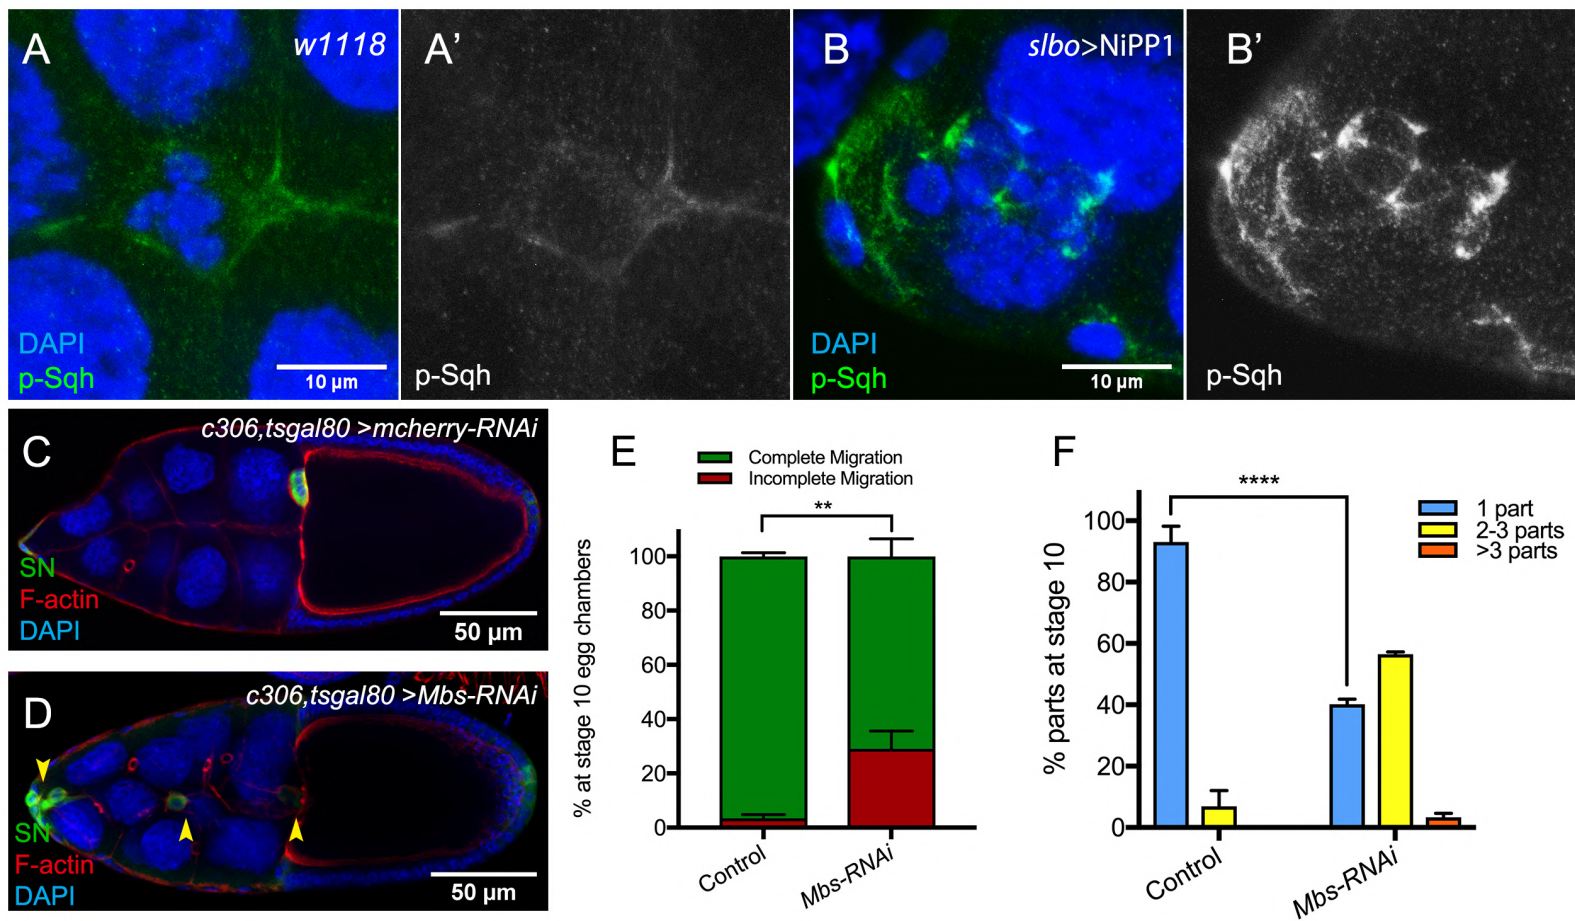



# Fig 8

bioRxiv preprint doi: <https://doi.org/10.1101/811562>; this version posted October 20, 2019. The copyright holder for this preprint (which was not certified by peer review) is the author/funder, who has granted bioRxiv a license to display the preprint in perpetuity. It is made available under aCC-BY-NC-ND 4.0 International license.

A

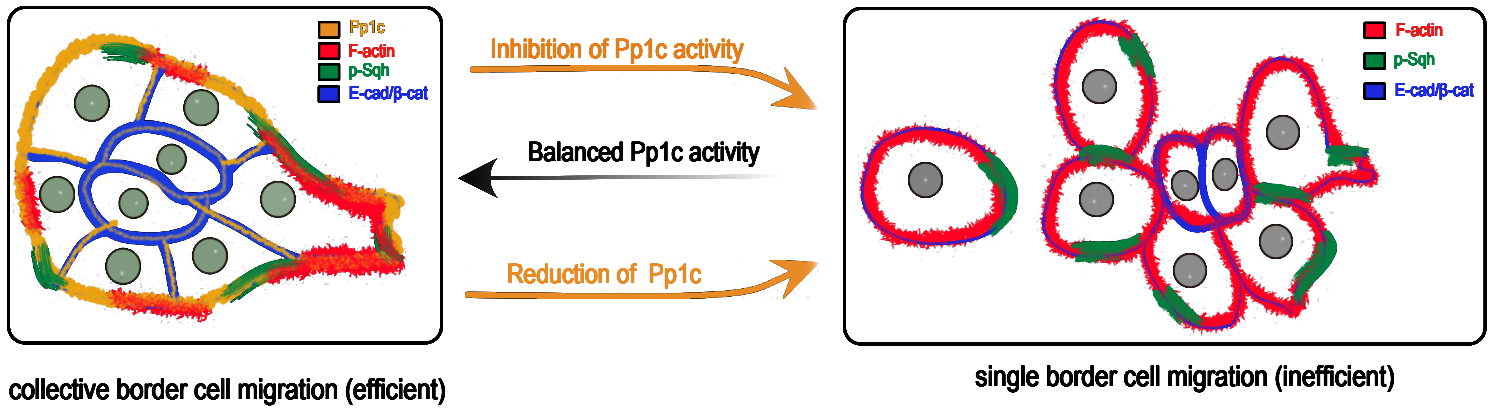

B

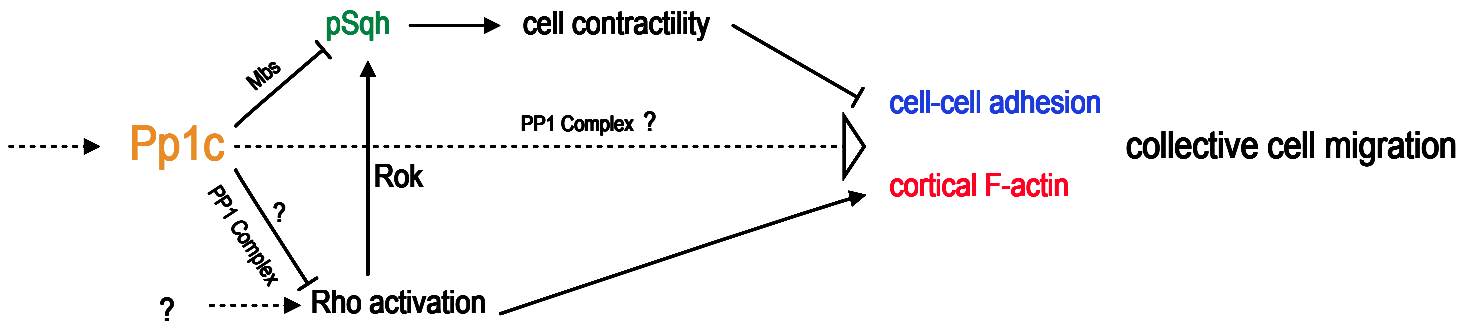

Source: http://biorxiv.org/content/10.1101/811562v1.full.pdf
